# Supplementary material for: Seasonal dynamics of mudflat foraminifera linked to diatom species and traits
Source: Copernicus journal article supplement (doi:10.5194/jm-45-51-2026), 2026-01-15
Supplement: Supplementary file 1 [file Table S1 - overview sampling strategy.pdf › Supplements/Table S1 - overview sampling strategy.pdf]

**Table S1: Overview of sampling strategies and temporal framework.**

| <b>Variables</b>                                  | <b>Time of sampling</b>   | <b>Sampling frequency</b>                                            | <b>Sampling sites</b> |
|---------------------------------------------------|---------------------------|----------------------------------------------------------------------|-----------------------|
| <b>Hydrological and Meteorological parameters</b> | March 2016 – October 2019 | Monthly                                                              | See 2.2 section       |
| <b>Geochemistry</b>                               | March 2016– July 2019     | Monthly from March 2016 to April 2017 then quarterly until July 2019 | A, B, C               |
| <b>Oxygen profiling</b>                           | March 2016– July 2019     | Monthly from March 2016 to April 2017 then quarterly until July 2019 | C                     |
| <b>Granulometry</b>                               | March 2017 – Mars 2019    | Monthly                                                              | A, B, C               |
| <b>NDVI</b>                                       | April 2017 – July 2019    | Monthly                                                              | A, B, C               |
| <b>Diatoms counting and identification</b>        | April 2017 – July 2019    | Monthly                                                              | B                     |
| <b>Foraminifera counting and identification</b>   | March 2016 – October 2019 | Monthly                                                              | A, B, C               |
