# Supplementary material for: Seasonal dynamics of mudflat foraminifera linked to diatom species and traits
Source: Copernicus journal article supplement (doi:10.5194/jm-45-51-2026), 2026-01-15
Supplement: Supplementary file 1 [file Table S2 - environmental data.xlsx]

## Sheet: Env raw data
Months	Years	Stations	Seasons	Porosity	Ba	Ca	Fe	K	Li	Mg	Mn	Salinity	P	S	Si	Sr	Alcalinity	NH4+	N:P	NO2-	NDVI	Granulometry	OPD	DOU	Tidal	Rainfall	Loire	Temp
03	2016	A	spring	0.88	1.27	9.69	8.44	9.03	NA	41.22	68.24	28.84	14.17	24.47	50.23	79.62	4.83	21.45	1.51	0.33	NA	NA	NA	NA	78	80	1440	8.3
04	2016	A	spring	0.84	NA	9.72	998.71	9.32	NA	45.49	77.16	30.87	NA	NA	NA	89.21	4.97	6.08	NA	NA	NA	NA	NA	NA	50	30.2	1310	10.1
05	2016	A	spring	0.84	NA	9.48	298.77	9.06	NA	48.32	221.61	31.32	NA	NA	102.08	93.13	6.06	5.73	NA	NA	NA	NA	NA	NA	106	57.2	893	14.5
06	2016	A	summer	NA	0.09	9.97	0	8.75	19.21	52.7	359.88	32.41	44.74	24.74	100.29	83.52	6.23	5.04	0.11	NA	NA	NA	NA	NA	103	46.6	1970	17.1
07	2016	A	summer	NA	0.13	10.86	269.14	9.55	26.36	49.42	272.45	33.14	13.08	24.98	127.49	86.17	8.22	NA	NA	NA	NA	NA	NA	NA	96	3.6	444	19.1
08	2016	A	summer	NA	0.13	12.13	131.22	10.52	16.55	52.46	269.05	35.32	6.22	27.56	157.36	93.55	4.89	55.64	8.95	0.25	NA	NA	NA	NA	78	7	227	20.1
09	2016	A	autumn	NA	0.05	11.98	0.51	10.71	18.65	54.35	274.61	36	5.21	28.03	104.61	93.8	6.97	32.08	6.15	0.03	NA	NA	NA	NA	111	27.8	206	18.4
10	2016	A	autumn	0.87	0.55	10.58	10.37	10.15	49	52.29	293.51	37.13	4.12	27.7	152.96	92.88	4.92	NA	NA	0.06	NA	NA	NA	NA	114	31.6	212	12.4
11	2016	A	autumn	0.88	0.56	10.8	10.12	10.45	48.45	52.25	167.63	36.76	3.43	27.76	153.27	92.81	4.39	57.02	16.64	0.02	NA	NA	NA	NA	105	82	457	9.6
12	2016	A	winter	0.91	0.03	10.61	NA	10.25	28.46	51.28	126.94	35.13	NA	26.94	60.48	90.83	4.55	2.08	NA	0.06	NA	NA	NA	NA	106	13.4	531	7.6
01	2017	A	winter	0.89	0.05	11.18	0.66	10.73	24.48	51.2	126.84	35.52	0.24	27.42	85.25	93.03	3.85	0	0	0	NA	NA	NA	NA	90	28.4	409	4.4
02	2017	A	winter	0.86	0.07	10.15	NA	9.98	26.29	47.87	55.47	33.18	1.62	25.46	100.05	83.82	3.81	33.01	20.38	0.11	NA	NA	NA	NA	99	74.4	783	8.2
03	2017	A	spring	0.85	0.09	10.36	108.57	9.59	22.19	46.72	86.53	32.06	5.34	24.46	NA	80.87	6.28	10.98	2.06	0.89	NA	24.61	NA	NA	97	62.4	1160	10.9
04	2017	A	spring	0.87	0.17	13.43	138.65	12.65	31.27	64.54	164.76	43.86	1.3	33.38	199.14	111.51	5.05	11.29	8.67	0.59	0.24	28.35	NA	NA	76	10.2	529	11
05	2017	A	spring	0.94	0.09	12.33	165.64	10.53	22.6	50.97	57.82	35.13	20.72	27.9	122.13	90.28	NA	NA	NA	NA	0.23	23.18	NA	NA	60	47.6	457	16.2
06	2017	A	summer	0.84	0.11	13.24	57.84	11.24	27.78	57.46	187.03	38.53	2.01	30.7	200.59	97.97	NA	19.34	9.62	0.39	0.3	20.64	NA	NA	102	28.6	257	18.7
07	2017	A	summer	0.85	0.09	12.22	166.35	10.43	22.4	50.48	57.37	34.79	20.55	27.63	121.09	89.42	NA	13.1	0.64	1.22	0.29	26.75	NA	NA	77	20	178	19.9
09	2017	A	autumn	NA	NA	NA	NA	NA	NA	NA	NA	NA	NA	NA	NA	NA	NA	NA	NA	NA	0.52	23.83	NA	NA	93	50.6	177	15.4
10	2017	A	autumn	0.86	0.09	12.45	95.13	11	29.45	54.97	135.7	38.1	0.73	30.85	155.69	96.11	5.43	150.98	205.47	1.92	0.25	23.66	NA	NA	77	32.2	165	15.1
01	2018	A	winter	0.79	0.11	10.91	32.36	10.52	27.19	44.94	135.7	38.1	0.73	30.85	156.95	96.11	4.99	71.09	96.76	0.32	0.18	23.12	NA	NA	77	86.4	2380	9
02	2018	A	winter	NA	NA	NA	NA	NA	NA	NA	NA	NA	NA	NA	NA	NA	NA	NA	NA	NA	0.32	26.14	NA	NA	89	46.8	2170	4.5
03	2018	A	spring	NA	NA	NA	NA	NA	NA	NA	NA	NA	NA	NA	NA	NA	NA	NA	NA	NA	0.22	79.39	NA	NA	98	74.4	1640	8.2
04	2018	A	spring	0.83	0.17	12.6	80.54	11.13	34.63	54.18	104.04	37.41	1.53	30.64	97.72	97.89	5.01	12.19	7.97	0.42	0.19	32.05	NA	NA	96	47.2	1240	12.9
05	2018	A	spring	NA	NA	NA	NA	NA	NA	NA	NA	NA	NA	NA	NA	NA	NA	NA	NA	NA	0.19	23.12	NA	NA	101	36.4	713	15.4
06	2018	A	summer	NA	NA	NA	NA	NA	NA	NA	NA	NA	NA	NA	NA	NA	NA	NA	NA	NA	0.12	26.14	NA	NA	81	89.8	951	19.4
07	2018	A	summer	NA	0.15	24.91	14.09	10.87	36.13	59.28	358.29	39.11	0.73	32.63	180.86	100.13	7.03	25.94	35.29	0.11	0.22	25.31	NA	NA	87	21.2	302	20.8
08	2018	A	summer	NA	NA	NA	NA	NA	NA	NA	NA	NA	NA	NA	NA	NA	NA	NA	NA	NA	0.33	27.06	NA	NA	85	43.6	161	19.6
09	2018	A	autumn	NA	NA	NA	NA	NA	NA	NA	NA	NA	NA	NA	NA	NA	NA	NA	NA	NA	0.13	21.57	NA	NA	87	6.2	161	17.4
10	2018	A	autumn	NA	0.08	12.59	139.67	10.42	27.61	54.67	312.1	37.26	0.68	30.1	61.31	90.9	NA	13.38	19.69	0.45	0.17	24.61	NA	NA	94	28.4	153	14
11	2018	A	autumn	NA	NA	NA	NA	NA	NA	NA	NA	NA	NA	NA	NA	NA	NA	NA	NA	NA	0.13	23.02	NA	NA	85	50.8	297	8.9
12	2018	A	winter	NA	NA	NA	NA	NA	NA	NA	NA	NA	NA	NA	NA	NA	NA	NA	NA	NA	0.42	26.32	NA	NA	85	100	670	8.9
01	2019	A	winter	0.89	0.1	10.86	NA	10.49	27.31	51.63	82.77	35	4.03	28.44	18.82	90.95	5.09	4.62	1.15	0.07	0.36	40.2	NA	NA	108	29.2	478	6.3
03	2019	A	spring	NA	NA	NA	NA	NA	NA	NA	NA	NA	NA	NA	NA	NA	NA	NA	NA	NA	0.38	22.59	NA	NA	111	41.6	698	10.2
04	2019	A	spring	0.86	0.28	11.43	62.26	10.52	30.22	54.7	120.35	36.76	9.08	30.54	46.39	91.68	NA	12.09	1.33	0.72	0.34	NA	NA	NA	97	38.2	379	11.8
05	2019	A	spring	NA	NA	NA	NA	NA	NA	NA	NA	NA	NA	NA	NA	NA	NA	NA	NA	NA	0.24	NA	NA	NA	88	50	373	13
06	2019	A	summer	NA	NA	NA	NA	NA	NA	NA	NA	NA	NA	NA	NA	NA	NA	NA	NA	NA	0.24	NA	NA	NA	82	50	264	17
07	2019	A	summer	0.8	0.08	15.11	89.47	11.18	26.48	59.41	30.12	39.19	2.84	33.06	182.4	105.24	6.48	8.99	3.17	0.18	0.27	NA	NA	NA	78	30	121	21
10	2019	A	autumn	0.82	0.04	12.77	21.58	10.49	31.66	58.58	122.28	38.11	18.07	32.08	57.31	99.49	6.41	11.6	0.64	0.24	NA	NA	NA	NA	86	90	185	17
03	2016	B	spring	0.87	1.12	9.65	30.93	8.87	NA	41.14	76.01	28.63	9.55	24.84	154.85	81.39	4.66	13.25	1.39	0.59	NA	NA	NA	NA	78	80	1440	8.3
04	2016	B	spring	0.86	NA	9.33	90.13	9.52	NA	44.85	52.06	30.06	NA	NA	NA	88.75	5.05	0.88	NA	NA	NA	NA	NA	NA	50	30.2	1310	10.1
05	2016	B	spring	0.9	NA	9.09	17.31	9.25	NA	50.37	357.19	32.3	NA	NA	77.85	95.48	5.98	6.34	NA	NA	NA	NA	NA	NA	106	57.2	893	14.5
06	2016	B	summer	NA	0.17	10.21	20.41	9.55	22.91	52.48	463.75	33.4	51.75	25.22	146.75	86.37	6.06	13.96	0.27	NA	NA	NA	NA	NA	103	46.6	1970	17.1
07	2016	B	summer	NA	0.14	12.39	391.2	10.08	27.48	48.99	87.94	33.31	20.36	25.75	127.83	88.73	6.2	NA	NA	NA	NA	NA	NA	NA	96	3.6	444	19.1
08	2016	B	summer	NA	0.13	12.13	131.22	10.52	16.55	52.46	269.05	35.32	6.22	27.56	157.36	93.55	NA	NA	NA	NA	NA	NA	NA	NA	78	7	227	20.1
09	2016	B	autumn	NA	0.03	11.83	0	10.78	21.06	54.15	91.84	35.69	3.48	27.77	132.45	93.95	5.23	181.05	52.04	0.62	NA	NA	NA	NA	111	27.8	206	18.4
10	2016	B	autumn	0.83	0.56	10.13	63.13	10.27	44.52	47.96	112.21	34.49	3.42	25.9	207.34	85.47	4.39	NA	NA	0.91	NA	NA	NA	NA	114	31.6	212	12.4
11	2016	B	autumn	0.83	0.56	10.64	31.9	11.14	49.29	50.44	70.61	36.26	3.04	27.41	219.93	90.76	4.6	55.16	18.12	0.38	NA	NA	NA	NA	105	82	457	9.6
12	2016	B	winter	0.88	0.04	10.7	NA	10.49	26.41	50.33	53.84	34.85	NA	26.99	77.11	91.65	4.3	3.21	NA	0.91	NA	NA	NA	NA	106	13.4	531	7.6
01	2017	B	winter	0.84	0.04	10.7	NA	11.15	25.57	50.36	7.51	35.28	4.03	27.4	52.67	90.95	3.34	0	0	0.64	NA	NA	NA	NA	90	28.4	409	4.4
02	2017	B	winter	0.93	0.06	10.9	NA	11.02	31.55	51.78	31.39	36.13	2.56	27.82	59.34	89.97	3.37	32.32	12.61	0.07	NA	NA	NA	NA	99	74.4	783	8.2
03	2017	B	spring	0.83	0.09	10.28	81.41	10.1	25.96	44.96	81.03	31.7	3.19	24.14	153.9	78.7	5.51	33.78	10.6	0.47	NA	25.78	NA	NA	97	62.4	1160	10.9
04	2017	B	spring	0.84	0.12	14.68	73.83	12.34	29.89	60.26	47.69	40.85	0.77	32.7	166.18	108.37	5.42	8.78	11.45	0.33	0.25	29.48	NA	NA	76	10.2	529	11
05	2017	B	spring	0.86	0.09	12.4	244.72	11.07	25.54	52.64	107.02	36.3	19.73	28.27	211.13	93.89	NA	NA	NA	NA	0.13	21.03	NA	NA	60	47.6	457	16.2
06	2017	B	summer	0.82	0.09	12.17	51.61	11.02	27.8	54.74	119.07	37.25	3.2	28.83	240.51	90.83	NA	12.26	3.83	0.22	0.34	22.96	NA	NA	102	28.6	257	18.7
07	2017	B	summer	0.84	0.1	13.21	83.17	11.49	27.28	59.89	91.42	39.21	5.53	31.36	205.13	99.49	NA	15.93	2.88	0.87	0.33	23.99	NA	NA	77	20	178	19.9
09	2017	B	autumn	NA	NA	NA	NA	NA	NA	NA	NA	NA	NA	NA	NA	NA	NA	NA	NA	NA	0.35	25.02	NA	NA	93	50.6	177	15.4
10	2017	B	autumn	0.85	0.12	11.67	14.09	10.87	31.22	53.81	125.87	36.99	0.91	30.23	192.58	93.33	5.82	134.5	148.48	3.82	0.26	25.48	NA	NA	77	32.2	165	15.1
01	2018	B	winter	0.82	0.09	10.28	26.66	10.3	26.26	44.3	125.87	36.99	0.91	30.23	190.83	93.33	4.82	49.02	54.11	0.19	0.23	24.56	NA	NA	77	86.4	2380	9
02	2018	B	winter	NA	NA	NA	NA	NA	NA	NA	NA	NA	NA	NA	NA	NA	NA	NA	NA	NA	0.39	30.95	NA	NA	89	46.8	2170	4.5
03	2018	B	spring	NA	NA	NA	NA	NA	NA	NA	NA	NA	NA	NA	NA	NA	NA	NA	NA	NA	0.23	34.59	NA	NA	98	74.4	1640	8.2
04	2018	B	spring	0.86	0.18	11.99	15.07	11.21	33.95	56.12	198.85	38.37	1.96	31.79	82.94	99.49	5.07	21.69	11.06	0.26	0.21	24.79	NA	NA	96	47.2	1240	12.9
05	2018	B	spring	NA	NA	NA	NA	NA	NA	NA	NA	NA	NA	NA	NA	NA	NA	NA	NA	NA	0.21	23.5	NA	NA	101	36.4	713	15.4
06	2018	B	summer	NA	NA	NA	NA	NA	NA	NA	NA	NA	NA	NA	NA	NA	NA	NA	NA	NA	0.22	NA	NA	NA	81	89.8	951	19.4
07	2018	B	summer	NA	0.1	18.36	35.13	10.47	31.07	52.82	375.92	36.41	2.11	28.33	203.19	90.01	6.22	34.61	16.38	0.13	0.29	24.73	NA	NA	87	21.2	302	20.8
08	2018	B	summer	NA	NA	NA	NA	NA	NA	NA	NA	NA	NA	NA	NA	NA	NA	NA	NA	NA	0.69	27.32	NA	NA	85	43.6	161	19.6
09	2018	B	autumn	NA	NA	NA	NA	NA	NA	NA	NA	NA	NA	NA	NA	NA	NA	NA	NA	NA	0.38	22.59	NA	NA	87	6.2	161	17.4
10	2018	B	autumn	NA	0.09	12.93	239.43	10.86	25.93	54.71	82.85	37.28	0.9	30.24	91.43	92.62	NA	12.42	13.79	1.14	0.77	24.9	NA	NA	94	28.4	153	14
11	2018	B	autumn	NA	NA	NA	NA	NA	NA	NA	NA	NA	NA	NA	NA	NA	NA	NA	NA	NA	0.18	NA	NA	NA	85	50.8	297	8.9
12	2018	B	winter	NA	NA	NA	NA	NA	NA	NA	NA	NA	NA	NA	NA	NA	NA	NA	NA	NA	0.43	25.43	NA	NA	85	100	670	8.9
01	2019	B	winter	0.91	0.11	10.99	NA	10.85	29.41	52.47	21.21	36.03	4.57	29.35	31.05	92.26	4.63	13.13	2.87	0.14	0.51	26.94	NA	NA	108	29.2	478	6.3
03	2019	B	spring	NA	NA	NA	NA	NA	NA	NA	NA	NA	NA	NA	NA	NA	NA	NA	NA	NA	0.45	26.51	NA	NA	111	41.6	698	10.2
04	2019	B	spring	0.91	0.28	11.84	18.18	11.55	33.6	60.9	138.52	40.82	10.06	33.61	82.09	102.56	NA	19.91	1.98	0.16	0.33	NA	NA	NA	97	38.2	379	11.8
05	2019	B	spring	NA	NA	NA	NA	NA	NA	NA	NA	NA	NA	NA	NA	NA	NA	NA	NA	NA	0.28	NA	NA	NA	88	50	373	13
06	2019	B	summer	NA	NA	NA	NA	NA	NA	NA	NA	NA	NA	NA	NA	NA	NA	NA	NA	NA	0.29	NA	NA	NA	82	50	264	17
07	2019	B	summer	0.82	0.07	13.92	4.83	11.55	29.31	58.9	36.43	38.84	2.2	33.18	148.6	103.93	6.77	7.51	3.42	0	0.29	NA	NA	NA	78	30	121	21
10	2019	B	autumn	0.86	0.02	11.06	NA	10.09	28.63	55.89	72.86	36.54	7.46	30.4	40.95	92.76	6.08	15.01	2.01	0	NA	NA	NA	NA	86	90	185	17
03	2016	C	spring	0.5	1.12	9.4	0.62	8.75	NA	40.39	83.94	28.11	8.62	24.09	92.1	81.5	NA	4.89	0.57	NA	NA	NA	1.82	13.36	78	80	1440	8.3
04	2016	C	spring	0.84	NA	8.74	105.77	9.33	NA	43.71	53.2	29.4	NA	NA	NA	87	4.34	36.64	NA	0.36	NA	NA	1.2	39.4	50	30.2	1310	10.1
05	2016	C	spring	0.9	NA	9.64	26.09	9.53	NA	51.37	318.95	34.02	NA	NA	136.67	94.89	6.38	7.77	NA	NA	NA	NA	2	30	106	57.2	893	14.5
06	2016	C	summer	NA	0.14	10.5	0	9.85	26.07	51.94	422.36	33.77	32.65	26.04	135.65	88.68	6.94	1.87	0.06	NA	NA	NA	NA	NA	103	46.6	1970	17.1
07	2016	C	summer	NA	0.13	12.2	361.85	9.68	25.08	47.77	81.45	32.2	27.48	24.96	140.54	86.77	6.8	NA	NA	NA	NA	NA	0.85	77.6	96	3.6	444	19.1
08	2016	C	summer	NA	0.13	12.13	131.22	10.52	16.55	52.46	269.05	35.32	6.22	27.56	157.36	93.55	NA	NA	NA	NA	NA	NA	1.3	44.1	78	7	227	20.1
09	2016	C	autumn	NA	0.04	11.53	0	10.5	18.56	52.48	78.44	35.69	21.59	28.04	91.7	93.05	5.78	32.04	1.48	0.72	NA	NA	2.09	25.5	111	27.8	206	18.4
10	2016	C	autumn	0.87	0.57	10.5	10.11	10.28	50.09	52.51	455.26	36.88	2.31	27.51	162.89	93.43	5.73	4.75	2.05	0.12	NA	NA	1.44	24.8	114	31.6	212	12.4
11	2016	C	autumn	0.87	0.55	11.06	13.74	10.76	48.14	52.61	117.35	36.72	2.25	28.13	158.63	94.34	4.39	48.75	21.65	0.11	NA	NA	1.46	42.9	105	82	457	9.6
12	2016	C	winter	0.9	0.04	11.09	NA	10.73	24.35	51.88	132.43	35.73	NA	27.51	61.79	93.29	4.9	1.87	-0.94	0.12	NA	NA	2.46	26.2	106	13.4	531	7.6
01	2017	C	winter	0.91	0.07	11.56	NA	10.91	30.33	53.16	158.1	36.86	NA	28.06	69.61	94.67	4.02	0	0	0.18	NA	NA	1.99	29.3	90	28.4	409	4.4
02	2017	C	winter	0.93	0.06	10.05	NA	10.06	26.92	48.07	44.9	33.06	6.05	25.35	94.51	83.65	4.49	29.94	4.95	0.08	NA	NA	1.59	34.7	99	74.4	783	8.2
03	2017	C	spring	0.86	0.08	10.44	32.85	9.92	24.46	46.11	91.47	31.86	1.57	24.6	196.73	80.99	5.58	4.6	2.72	0.33	NA	20.36	1.7	44	97	62.4	1160	10.9
04	2017	C	spring	0.86	0.17	14.92	193.98	12.9	32.12	64.36	154.84	43.66	0.7	34.12	210.2	114.07	5.64	10.31	14.68	0.6	0.3	29.21	2.14	20.1	76	10.2	529	11
05	2017	C	spring	0.86	0.09	12.4	244.72	11.07	25.54	52.64	107.02	36.3	19.73	28.27	211.13	93.89	NA	NA	NA	NA	0.22	NA	1.52	27.3	60	47.6	457	16.2
06	2017	C	summer	0.81	0.11	12.67	114.17	11.33	25.65	57.43	160.44	38.6	5.02	31.02	175.1	91.75	NA	19.34	3.85	1.75	0.33	21.98	1.21	39.3	102	28.6	257	18.7
07	2017	C	summer	0.85	0.1	13.39	93.62	11.8	25.65	61.59	102.75	41.58	4.73	32.89	207.44	97.11	NA	23.35	4.94	0.52	0.27	21.42	1.07	55.1	77	20	178	19.9
09	2017	C	autumn	NA	NA	NA	NA	NA	NA	NA	NA	NA	NA	NA	NA	NA	NA	NA	NA	NA	0.37	NA	NA	NA	93	50.6	177	15.4
10	2017	C	autumn	0.85	0.13	11.92	12.08	11.08	30.79	54.64	120.1	37.63	0.01	30.49	174.89	94.53	5.52	156.09	15609	1.87	0.27	NA	1.45	36.7	77	32.2	165	15.1
01	2018	C	winter	0.78	0.07	10.53	28.72	10.35	29.47	45.1	120.1	37.63	NA	30.49	173.95	94.53	5.45	56.82	NA	0.32	0.23	26.88	1.8	16	77	86.4	2380	9
02	2018	C	winter	NA	NA	NA	NA	NA	NA	NA	NA	NA	NA	NA	NA	NA	NA	NA	NA	NA	0.49	28.88	NA	NA	89	46.8	2170	4.5
03	2018	C	spring	NA	NA	NA	NA	NA	NA	NA	NA	NA	NA	NA	NA	NA	NA	NA	NA	NA	0.23	NA	NA	NA	98	74.4	1640	8.2
04	2018	C	spring	0.87	0.2	12.89	13.59	11.14	34.82	57.02	231.26	38.63	NA	32.66	120.9	104.39	5.63	8.75	NA	0.41	0.19	24.16	0.87	29.5	96	47.2	1240	12.9
05	2018	C	spring	NA	NA	NA	NA	NA	NA	NA	NA	NA	NA	NA	NA	NA	NA	NA	NA	NA	0.18	22.91	NA	NA	101	36.4	713	15.4
06	2018	C	summer	NA	NA	NA	NA	NA	NA	NA	NA	NA	NA	NA	NA	NA	NA	NA	NA	NA	0.11	NA	NA	NA	81	89.8	951	19.4
07	2018	C	summer	NA	0.14	14.73	53.45	10.23	28.95	55.77	518.11	37.86	3.01	30.23	174.24	94.81	5.92	40.6	13.49	0.09	0.33	31.53	NA	NA	87	21.2	302	20.8
08	2018	C	summer	NA	NA	NA	NA	NA	NA	NA	NA	NA	NA	NA	NA	NA	NA	NA	NA	NA	0.79	NA	NA	NA	85	43.6	161	19.6
09	2018	C	autumn	NA	NA	NA	NA	NA	NA	NA	NA	NA	NA	NA	NA	NA	NA	NA	NA	NA	0.14	NA	NA	NA	87	6.2	161	17.4
10	2018	C	autumn	NA	0.09	11.95	139.8	10.44	28.92	55.11	355.35	37.11	NA	29.95	79.62	92.51	NA	14.95	NA	0.35	0.22	NA	NA	NA	94	28.4	153	14
11	2018	C	autumn	NA	NA	NA	NA	NA	NA	NA	NA	NA	NA	NA	NA	NA	NA	NA	NA	NA	0.22	24.96	NA	NA	85	50.8	297	8.9
12	2018	C	winter	NA	NA	NA	NA	NA	NA	NA	NA	NA	NA	NA	NA	NA	NA	NA	NA	NA	0.42	23.28	NA	NA	85	100	670	8.9
01	2019	C	winter	0.84	0.11	11.14	123.11	11.38	30.4	52.38	179.9	36.23	4.95	29.21	12.95	92.81	5.45	6.83	1.38	1.24	0.39	24.96	1.4	33.83	108	29.2	478	6.3
03	2019	C	spring	NA	NA	NA	NA	NA	NA	NA	NA	NA	NA	NA	NA	NA	NA	NA	NA	NA	0.44	24.61	NA	NA	111	41.6	698	10.2
04	2019	C	spring	0.76	0.31	12.72	251.62	11.45	31.4	54.71	53.02	37.41	9.59	31.44	66.63	94.68	NA	35.18	3.67	2.05	0.36	NA	1.02	67.6	97	38.2	379	11.8
05	2019	C	spring	NA	NA	NA	NA	NA	NA	NA	NA	NA	NA	NA	NA	NA	NA	NA	NA	NA	0.36	NA	NA	NA	88	50	373	13
06	2019	C	summer	NA	NA	NA	NA	NA	NA	NA	NA	NA	NA	NA	NA	NA	NA	NA	NA	NA	0.29	NA	NA	NA	82	50	264	17
07	2019	C	summer	0.81	0.09	11.69	15.74	9.75	24.55	48.06	38.47	32.51	3.25	26.85	129.22	85.48	6.54	9.38	2.89	0	0.26	NA	NA	NA	78	30	121	21
10	2019	C	autumn	0.83	0.04	11.84	NA	10.63	29.09	56.92	78.13	37.64	7.13	31.15	61.7	95.4	6.99	13.23	1.86	0.06	NA	NA	1.1	40.01	86	90	185	17

## Sheet: Env transformed data
Months	Years	Stations	Seasons	Porosity	Ba	Ca	Fe	K	Li	Mg	Mn	Salinity	P	S	Si	Sr	Alcalinity	NH4+	N:P	NO2-	NDVI	Granulometry	OPD	DOU	Tidal	Rainfall	Loire	Temp
03	2016	A	spring	0.47	4.03	-0.78	-0.57	-1.63	NA	-2.19	-0.97	0.06	0.61	-1.52	-1.29	-1.85	-0.62	-0.23	-0.14	-0.26	NA	NA	NA	NA	-0.89	1.39	1.3	-1.07
04	2016	A	spring	-0.39	NA	-0.78	4.2	-1.27	NA	-1.35	-0.88	0.23	NA	NA	NA	-0.5	-0.5	-0.33	NA	3.44	NA	NA	NA	NA	-2.9	-0.56	1.08	-0.7
05	2016	A	spring	-0.58	NA	-0.86	0.83	-1.59	NA	-0.79	0.58	0.28	NA	NA	-0.28	0.06	0.49	-0.33	NA	NA	NA	NA	NA	NA	1.12	0.5	0.39	0.21
06	2016	A	summer	NA	-0.38	-0.69	-0.61	-1.96	-1.16	0.07	1.97	0.36	3.55	-1.42	-0.31	-1.3	0.65	-0.33	-0.14	NA	NA	NA	NA	NA	0.91	0.08	2.19	0.75
07	2016	A	summer	NA	-0.21	-0.39	0.69	-1	-0.26	-0.58	1.09	0.42	0.5	-1.34	0.22	-0.93	2.47	NA	NA	NA	NA	NA	NA	NA	0.41	-1.61	-0.36	1.16
08	2016	A	summer	NA	-0.22	0.04	0.02	0.18	-1.49	0.02	1.06	0.60	-0.16	-0.4	0.8	0.12	-0.57	0	-0.13	-0.37	NA	NA	NA	NA	-0.89	-1.47	-0.73	1.36
09	2016	A	autumn	NA	-0.53	-0.01	-0.6	0.41	-1.23	0.39	1.11	0.65	-0.26	-0.24	-0.23	0.15	1.32	-0.16	-0.13	-0.68	NA	NA	NA	NA	1.48	-0.66	-0.76	1.01
10	2016	A	autumn	0.18	1.35	-0.49	-0.56	-0.26	2.57	-0.01	1.3	0.75	-0.36	-0.35	0.71	0.02	-0.54	4.59	NA	-0.64	NA	NA	NA	NA	1.7	-0.51	-0.75	-0.22
11	2016	A	autumn	0.66	1.39	-0.41	-0.56	0.1	2.5	-0.02	0.03	0.72	-0.43	-0.33	0.72	0.01	-1.02	0.01	-0.13	-0.7	NA	NA	NA	NA	1.05	1.47	-0.34	-0.8
12	2016	A	winter	1.41	-0.6	-0.47	NA	-0.14	0	-0.21	-0.37	0.58	NA	-0.63	-1.09	-0.27	-0.88	-0.35	NA	-0.64	NA	NA	NA	NA	1.12	-1.22	-0.22	-1.21
01	2017	A	winter	0.82	-0.52	-0.28	-0.6	0.44	-0.5	-0.23	-0.38	0.61	-0.74	-0.46	-0.61	0.04	-1.52	-0.37	-0.14	-0.72	NA	NA	NA	NA	-0.02	-0.63	-0.42	-1.87
02	2017	A	winter	0.07	-0.47	-0.63	NA	-0.47	-0.27	-0.88	-1.09	0.42	-0.6	-1.16	-0.32	-1.26	-1.56	-0.15	-0.13	-0.57	NA	NA	NA	NA	0.62	1.17	0.2	-1.09
03	2017	A	spring	-0.27	-0.39	-0.56	-0.08	-0.95	-0.78	-1.11	-0.78	0.33	-0.24	-1.52	NA	-1.68	0.69	-0.29	-0.14	0.52	NA	-0.29	NA	NA	0.48	0.7	0.83	-0.53
04	2017	A	spring	0.41	-0.1	0.48	0.06	2.77	0.35	2.39	0.01	1.30	-0.63	1.7	1.61	2.66	-0.42	-0.29	-0.13	0.1	-1	0.01	NA	NA	-1.03	-1.35	-0.22	-0.51
05	2017	A	spring	2.39	-0.39	0.11	0.19	0.2	-0.73	-0.27	-1.07	0.58	1.24	-0.28	0.11	-0.35	NA	NA	NA	NA	-0.75	-0.4	NA	NA	-2.18	0.12	-0.34	0.56
06	2017	A	summer	-0.66	-0.3	0.41	-0.33	1.06	-0.08	1	0.23	0.86	-0.57	0.73	1.64	0.74	NA	-0.24	-0.13	-0.18	0.52	-0.6	NA	NA	0.84	-0.63	-0.68	1.08
07	2017	A	summer	-0.15	-0.39	0.07	0.19	0.08	-0.76	-0.37	-1.07	0.55	1.22	-0.38	0.09	-0.47	NA	-0.28	-0.14	0.98	-0.17	-0.11	NA	NA	-0.96	-0.96	-0.81	1.32
09	2017	A	autumn	NA	NA	NA	NA	NA	NA	NA	NA	NA	NA	NA	NA	NA	NA	NA	NA	NA	0.07	-0.35	NA	NA	0.19	0.24	-0.81	0.4
10	2017	A	autumn	0.07	-0.37	0.15	-0.15	0.77	0.12	0.51	-0.29	0.83	-0.69	0.78	0.76	0.48	-0.08	0.63	-0.09	1.96	0.6	-0.36	NA	NA	-0.96	-0.49	-0.83	0.33
01	2018	A	winter	-1.84	-0.29	-0.37	-0.45	0.18	-0.16	-1.46	-0.29	0.83	-0.69	0.78	0.79	0.48	-0.48	0.1	-0.11	-0.27	0.2	-0.41	NA	NA	-0.96	1.64	2.87	-0.92
02	2018	A	winter	NA	NA	NA	NA	NA	NA	NA	NA	NA	NA	NA	NA	NA	NA	NA	NA	NA	1.57	-0.16	NA	NA	-0.1	0.09	2.52	-1.85
03	2018	A	spring	NA	NA	NA	NA	NA	NA	NA	NA	NA	NA	NA	NA	NA	NA	NA	NA	NA	-1.56	4.11	NA	NA	0.55	1.17	1.63	-1.09
04	2018	A	spring	-0.7	-0.07	0.2	-0.22	0.92	0.77	0.36	-0.6	0.77	-0.61	0.71	-0.36	0.73	-0.46	-0.29	-0.13	-0.14	-0.73	0.31	NA	NA	0.41	0.1	0.97	-0.12
05	2018	A	spring	NA	NA	NA	NA	NA	NA	NA	NA	NA	NA	NA	NA	NA	NA	NA	NA	NA	0.04	-0.41	NA	NA	0.76	-0.32	0.09	0.4
06	2018	A	summer	NA	NA	NA	NA	NA	NA	NA	NA	NA	NA	NA	NA	NA	NA	NA	NA	NA	-0.58	-0.16	NA	NA	-0.67	1.77	0.48	1.22
07	2018	A	summer	NA	-0.15	4.36	-0.54	0.61	0.96	1.36	1.95	0.91	-0.69	1.43	1.25	1.05	1.38	-0.2	-0.13	-0.57	-0.24	-0.23	NA	NA	-0.24	-0.92	-0.6	1.51
08	2018	A	summer	NA	NA	NA	NA	NA	NA	NA	NA	NA	NA	NA	NA	NA	NA	NA	NA	NA	2.8	-0.09	NA	NA	-0.38	-0.04	-0.84	1.26
09	2018	A	autumn	NA	NA	NA	NA	NA	NA	NA	NA	NA	NA	NA	NA	NA	NA	NA	NA	NA	0.78	-0.53	NA	NA	-0.24	-1.51	-0.84	0.81
10	2018	A	autumn	NA	-0.4	0.2	0.07	0.07	-0.1	0.45	1.49	0.76	-0.69	0.51	-1.07	-0.26	NA	-0.28	-0.13	-0.1	0.07	-0.29	NA	NA	0.26	-0.63	-0.85	0.11
11	2018	A	autumn	NA	NA	NA	NA	NA	NA	NA	NA	NA	NA	NA	NA	NA	NA	NA	NA	NA	0.97	-0.41	NA	NA	-0.38	0.24	-0.61	-0.94
12	2018	A	winter	NA	NA	NA	NA	NA	NA	NA	NA	NA	NA	NA	NA	NA	NA	NA	NA	NA	-0.12	-0.15	NA	NA	-0.38	2.18	0.01	-0.94
01	2019	A	winter	0.77	-0.34	-0.39	NA	0.15	-0.14	-0.14	-0.82	0.57	-0.37	-0.09	-1.9	-0.25	-0.38	-0.34	-0.14	-0.62	-0.81	0.97	NA	NA	1.27	-0.6	-0.31	-1.48
03	2019	A	spring	NA	NA	NA	NA	NA	NA	NA	NA	NA	NA	NA	NA	NA	NA	NA	NA	NA	0.22	-0.45	NA	NA	1.48	-0.12	0.06	-0.68
04	2019	A	spring	0.12	0.33	-0.2	-0.31	0.19	0.22	0.46	-0.44	0.72	0.12	0.67	-1.36	-0.15	0.32	-0.29	-0.14	0.29	-1.19	NA	NA	NA	0.48	-0.25	-0.47	-0.35
05	2019	A	spring	NA	NA	NA	NA	NA	NA	NA	NA	NA	NA	NA	NA	NA	NA	NA	NA	NA	-0.96	NA	NA	NA	-0.17	0.21	-0.48	-0.1
06	2019	A	summer	NA	NA	NA	NA	NA	NA	NA	NA	NA	NA	NA	NA	NA	NA	NA	NA	NA	-0.96	NA	NA	NA	-0.6	0.21	-0.66	0.73
07	2019	A	summer	-1.8	-0.41	1.05	-0.18	0.99	-0.25	1.38	-1.35	0.92	-0.49	1.58	1.28	1.77	0.88	-0.31	-0.14	-0.47	1.24	NA	NA	NA	-0.89	-0.57	-0.9	1.55
10	2019	A	autumn	-1.01	-0.56	0.25	-0.5	0.15	0.4	1.22	-0.42	0.83	0.98	1.23	-1.15	0.96	0.82	-0.29	-0.14	-0.38	NA	NA	NA	NA	-0.31	1.78	-0.8	0.73
03	2016	B	spring	0.34	3.84	-1.05	-0.49	-2.24	NA	-2.21	-0.44	0.04	0.2	-1.47	0.27	-1.74	-0.57	-0.29	-0.14	0.03	NA	NA	NA	NA	-0.89	1.39	1.3	-1.07
04	2016	B	spring	0.1	NA	-1.21	0.11	-1.42	NA	-1.47	-0.65	0.16	NA	NA	NA	-0.6	-0.14	-0.35	NA	NA	NA	NA	NA	NA	-2.9	-0.56	1.08	-0.7
05	2016	B	spring	1.31	NA	-1.34	-0.63	-1.76	NA	-0.37	2	0.35	NA	NA	-0.96	0.44	0.91	-0.33	NA	NA	NA	NA	NA	NA	1.12	0.5	0.39	0.21
06	2016	B	summer	NA	-0.06	-0.76	-0.6	-1.38	-0.92	0.05	2.93	0.44	4.02	-1.32	0.14	-0.97	0.99	-0.29	-0.14	NA	NA	NA	NA	NA	0.91	0.08	2.19	0.75
07	2016	B	summer	NA	-0.19	0.37	3.16	-0.7	-0.25	-0.64	-0.34	0.43	1.18	-1.12	-0.17	-0.6	1.19	NA	NA	NA	NA	NA	NA	NA	0.41	-1.61	-0.36	1.16
08	2016	B	summer	NA	-0.21	0.24	0.53	-0.14	-1.84	0.05	1.24	NA	-0.1	-0.44	0.31	0.14	-0.32	-0.09	NA	-0.4	NA	NA	NA	NA	-0.89	-1.47	-0.73	1.36
09	2016	B	autumn	NA	-0.61	0.08	-0.8	0.19	-1.19	0.39	-0.3	0.63	-0.35	-0.36	-0.09	0.2	0.07	0.52	-0.12	0.05	NA	NA	NA	NA	1.48	-0.66	-0.76	1.01
10	2016	B	autumn	-0.83	1.55	-0.8	-0.16	-0.46	2.24	-0.85	-0.13	0.53	-0.35	-1.07	1.11	-1.11	-0.88	4.59	NA	0.41	NA	NA	NA	NA	1.7	-0.51	-0.75	-0.22
11	2016	B	autumn	-0.78	1.55	-0.53	-0.48	0.65	2.93	-0.36	-0.49	0.67	-0.38	-0.5	1.31	-0.29	-0.64	-0.09	-0.13	-0.25	NA	NA	NA	NA	1.05	1.47	-0.34	-0.8
12	2016	B	winter	0.65	-0.58	-0.5	NA	-0.18	-0.4	-0.38	-0.63	0.56	NA	-0.66	-0.98	-0.15	-0.97	-0.34	NA	0.41	NA	NA	NA	NA	1.12	-1.22	-0.22	-1.21
01	2017	B	winter	-0.69	-0.58	-0.5	NA	0.66	-0.53	-0.37	-1.04	0.59	-0.3	-0.5	-1.37	-0.26	-2.05	-0.36	-0.14	0.08	NA	NA	NA	NA	-0.02	-0.63	-0.42	-1.87
02	2017	B	winter	2.21	-0.52	-0.4	NA	0.49	0.35	-0.09	-0.83	0.66	-0.43	-0.34	-1.26	-0.41	-2.02	-0.2	-0.13	-0.62	NA	NA	NA	NA	0.62	1.17	0.2	-1.09
03	2017	B	spring	-0.97	-0.4	-0.72	0.02	-0.67	-0.47	-1.45	-0.4	0.30	-0.37	-1.73	0.25	-2.15	0.38	-0.19	-0.13	-0.13	NA	-0.01	NA	NA	0.48	0.7	0.83	-0.53
04	2017	B	spring	-0.68	-0.26	1.55	-0.05	2.17	0.1	1.61	-0.69	1.05	-0.59	1.5	0.45	2.43	0.28	-0.31	-0.13	-0.3	-0.58	1.17	NA	NA	-1.03	-1.35	-0.22	-0.51
05	2017	B	spring	0.08	-0.38	0.38	1.68	0.56	-0.53	0.08	-0.17	0.68	1.12	-0.17	1.17	0.19	NA	NA	NA	NA	-1.35	-1.53	NA	NA	-2.18	0.12	-0.34	0.56
06	2017	B	summer	-1.03	-0.4	0.26	-0.28	0.5	-0.2	0.5	-0.07	0.76	-0.37	0.04	1.64	-0.28	NA	-0.3	-0.14	-0.44	0.01	-0.91	NA	NA	0.84	-0.63	-0.68	1.08
07	2017	B	summer	-0.47	-0.36	0.8	0.04	1.09	-0.28	1.53	-0.31	0.92	-0.16	1	1.07	1.06	NA	-0.28	-0.14	0.36	-0.04	-0.58	NA	NA	-0.96	-0.96	-0.81	1.32
09	2017	B	autumn	NA	NA	NA	NA	NA	NA	NA	NA	NA	NA	NA	NA	NA	NA	NA	NA	NA	0.1	-0.26	NA	NA	0.19	0.24	-0.81	0.4
10	2017	B	autumn	-0.22	-0.27	0	-0.66	0.3	0.3	0.32	-0.01	0.73	-0.58	0.57	0.87	0.11	0.73	0.3	-0.10	3.99	-0.5	-0.11	NA	NA	-0.96	-0.49	-0.83	0.33
01	2018	B	winter	-1.14	-0.38	-0.72	-0.53	-0.42	-0.43	-1.58	-0.01	0.73	-0.58	0.57	0.84	0.11	-0.39	-0.12	-0.12	-0.47	-0.7	-0.4	NA	NA	-0.96	1.64	2.87	-0.92
02	2018	B	winter	NA	NA	NA	NA	NA	NA	NA	NA	NA	NA	NA	NA	NA	NA	NA	NA	NA	0.42	1.64	NA	NA	-0.1	0.09	2.52	-1.85
03	2018	B	spring	NA	NA	NA	NA	NA	NA	NA	NA	NA	NA	NA	NA	NA	NA	NA	NA	NA	-0.7	2.8	NA	NA	0.55	1.17	1.63	-1.09
04	2018	B	spring	0.16	-0.01	0.17	-0.65	0.74	0.7	0.78	0.63	0.85	-0.48	1.16	-0.88	1.06	-0.11	-0.25	-0.13	-0.39	-0.79	-0.33	NA	NA	0.41	0.1	0.97	-0.12
05	2018	B	spring	NA	NA	NA	NA	NA	NA	NA	NA	NA	NA	NA	NA	NA	NA	NA	NA	NA	-0.84	-0.74	NA	NA	0.76	-0.32	0.09	0.4
06	2018	B	summer	NA	NA	NA	NA	NA	NA	NA	NA	NA	NA	NA	NA	NA	NA	NA	NA	NA	-0.76	NA	NA	NA	-0.67	1.77	0.48	1.22
07	2018	B	summer	NA	-0.33	3.46	-0.45	-0.2	0.28	0.12	2.16	0.69	-0.47	-0.15	1.04	-0.41	1.17	-0.19	-0.13	-0.55	-0.32	-0.35	NA	NA	-0.24	-0.92	-0.6	1.51
08	2018	B	summer	NA	NA	NA	NA	NA	NA	NA	NA	NA	NA	NA	NA	NA	NA	NA	NA	NA	2.32	0.48	NA	NA	-0.38	-0.04	-0.84	1.26
09	2018	B	autumn	NA	NA	NA	NA	NA	NA	NA	NA	NA	NA	NA	NA	NA	NA	NA	NA	NA	0.31	-1.03	NA	NA	-0.24	-1.51	-0.84	0.81
10	2018	B	autumn	NA	-0.38	0.65	1.62	0.29	-0.47	0.5	-0.38	0.76	-0.58	0.57	-0.75	0	NA	-0.3	-0.13	0.69	2.87	-0.29	NA	NA	0.26	-0.63	-0.85	0.11
11	2018	B	autumn	NA	NA	NA	NA	NA	NA	NA	NA	NA	NA	NA	NA	NA	NA	NA	NA	NA	-1.03	NA	NA	NA	-0.38	0.24	-0.61	-0.94
12	2018	B	winter	NA	NA	NA	NA	NA	NA	NA	NA	NA	NA	NA	NA	NA	NA	NA	NA	NA	0.65	-0.13	NA	NA	-0.38	2.18	0.01	-0.94
01	2019	B	winter	1.42	-0.3	-0.35	NA	0.28	0.03	0.05	-0.92	0.66	-0.25	0.24	-1.71	-0.06	-0.61	-0.29	-0.14	-0.54	1.15	0.36	NA	NA	1.27	-0.6	-0.31	-1.48
03	2019	B	spring	NA	NA	NA	NA	NA	NA	NA	NA	NA	NA	NA	NA	NA	NA	NA	NA	NA	0.75	0.22	NA	NA	1.48	-0.12	0.06	-0.68
04	2019	B	spring	1.61	0.41	0.08	-0.62	1.16	0.64	1.73	0.1	1.05	0.25	1.85	-0.9	1.53	0.2	-0.26	-0.14	-0.51	-0.02	NA	NA	NA	0.48	-0.25	-0.47	-0.35
05	2019	B	spring	NA	NA	NA	NA	NA	NA	NA	NA	NA	NA	NA	NA	NA	NA	NA	NA	NA	-0.38	NA	NA	NA	-0.17	0.21	-0.48	-0.1
06	2019	B	summer	NA	NA	NA	NA	NA	NA	NA	NA	NA	NA	NA	NA	NA	NA	NA	NA	NA	-0.26	NA	NA	NA	-0.6	0.21	-0.66	0.73
07	2019	B	summer	-1.19	-0.47	1.16	-0.75	1.16	0.02	1.33	-0.79	0.89	-0.46	1.68	0.17	1.74	1.79	-0.32	-0.14	-0.71	-0.31	NA	NA	NA	-0.89	-0.57	-0.9	1.55
10	2019	B	autumn	0.11	-0.66	-0.32	NA	-0.68	-0.08	0.73	-0.47	0.70	0.01	0.63	-1.55	0.02	1.01	-0.28	-0.14	-0.71	NA	NA	NA	NA	-0.31	1.78	-0.8	0.73
03	2016	C	spring	0.28	3.83	-1.49	-0.89	-2.08	NA	-2.26	-0.67	2.13	0.09	-1.72	-0.73	-1.67	-0.76	NA	-0.14	NA	NA	NA	-1.21	NA	-0.89	1.39	1.3	-1.07
04	2016	C	spring	-0.22	NA	-1.94	0.16	-1.41	NA	-1.63	-0.9	NA	NA	NA	NA	-0.86	-1.4	0.29	NA	-0.3	NA	NA	NA	NA	-2.9	-0.56	1.08	-0.7
05	2016	C	spring	1.09	NA	-1.33	-0.64	-1.17	NA	-0.18	1.08	-1.48	NA	NA	0.09	0.32	1	-0.57	NA	NA	NA	NA	-0.78	1.08	1.12	0.5	0.39	0.21
06	2016	C	summer	NA	-0.22	-0.75	-0.9	-0.81	-0.39	-0.07	1.85	-1.49	2.61	-1	0.07	-0.61	1.66	-0.75	-0.14	NA	NA	NA	NA	NA	0.91	0.08	2.19	0.75
07	2016	C	summer	NA	-0.25	0.4	2.74	-1	-0.52	-0.86	-0.69	-1.46	2.07	-1.4	0.16	-0.89	1.5	NA	NA	NA	NA	NA	-0.89	0.35	0.41	-1.61	-0.36	1.16
08	2016	C	summer	NA	-0.25	0.36	0.42	-0.04	-1.65	0.03	0.71	NA	-0.16	-0.44	0.47	0.12	-0.76	0.86	NA	-0.47	NA	NA	-0.15	2.13	-0.89	-1.47	-0.73	1.36
09	2016	C	autumn	NA	-0.61	-0.05	-0.9	-0.06	-1.39	0.03	-0.71	-1.80	1.45	-0.27	-0.73	0.04	0.29	0.16	-0.14	0.27	NA	NA	0.7	-0.19	1.48	-0.66	-0.76	1.01
10	2016	C	autumn	0.39	1.58	-0.75	-0.8	-0.31	2.79	0.04	2.09	-1.32	-0.57	-0.46	0.57	0.1	0.23	-0.67	-0.14	-0.69	NA	NA	2.09	-1.06	1.7	-0.51	-0.75	-0.22
11	2016	C	autumn	0.47	1.5	-0.37	-0.76	0.24	2.53	0.06	-0.42	-1.35	-0.57	-0.24	0.49	0.24	-1.35	0.66	-0.13	-0.7	NA	NA	0.28	0.58	1.05	1.47	-0.34	-0.8
12	2016	C	winter	1.12	-0.64	-0.35	NA	0.21	-0.62	-0.08	-0.31	-1.94	-1.02	-0.47	-1.28	0.08	-0.75	-0.75	-0.14	-0.69	NA	NA	1.45	-0.59	1.12	-1.22	-0.22	-1.21
01	2017	C	winter	1.25	-0.5	-0.03	NA	0.41	0.17	0.16	-0.12	-1.90	-1.07	-0.26	-1.14	0.28	-1.78	-0.81	-0.14	-0.59	NA	NA	1.45	-1.38	-0.02	-0.63	-0.42	-1.87
02	2017	C	winter	1.82	-0.54	-1.05	NA	-0.57	-0.28	-0.8	-0.96	-1.74	-0.18	-1.25	-0.68	-1.35	-1.24	0.09	-0.14	-0.74	NA	NA	1.02	-1.16	0.62	1.17	0.2	-1.09
03	2017	C	spring	0.03	-0.45	-0.78	-0.57	-0.73	-0.61	-1.18	-0.61	-1.11	-0.64	-1.53	1.19	-1.75	0.06	-0.68	-0.14	-0.34	NA	-1.41	0.49	0.72	0.48	0.7	0.83	-0.53
04	2017	C	spring	0.12	-0.09	2.24	1.05	2.7	0.41	2.28	-0.14	-1.03	-0.73	1.96	1.43	3.17	0.13	-0.5	-0.13	0.09	-0.09	1.27	NA	NA	-1.03	-1.35	-0.22	-0.51
05	2017	C	spring	0.19	-0.42	0.54	1.56	0.6	-0.46	0.06	-0.5	-0.79	1.25	-0.19	1.45	0.17	NA	NA	NA	NA	-0.7	NA	-0.78	-0.62	-2.18	0.12	-0.34	0.56
06	2017	C	summer	-0.98	-0.34	0.73	0.25	0.89	-0.45	0.97	-0.1	-1.24	-0.28	0.82	0.79	-0.15	NA	-0.23	-0.14	1.9	0.12	-0.92	0.07	-0.48	0.84	-0.63	-0.68	1.08
07	2017	C	summer	0.01	-0.39	1.21	0.04	1.43	-0.45	1.76	-0.53	-1.04	-0.31	1.51	1.38	0.65	NA	-0.11	-0.14	-0.05	-0.3	-1.09	-0.78	1.13	-0.96	-0.96	-0.81	1.32
09	2017	C	autumn	NA	NA	NA	NA	NA	NA	NA	NA	NA	NA	NA	NA	NA	NA	NA	NA	NA	0.42	NA	NA	NA	0.19	0.24	-0.81	0.4
10	2017	C	autumn	0	-0.25	0.22	-0.78	0.61	0.23	0.44	-0.4	-1.25	-0.81	0.63	0.79	0.26	-0.01	3.88	7.42	2.1	-0.33	NA	-0.15	-0.12	-0.96	-0.49	-0.83	0.33
01	2018	C	winter	-1.71	-0.49	-0.73	-0.61	-0.24	0.06	-1.37	-0.4	-1.25	NA	0.63	0.77	0.26	-0.1	0.9	NA	-0.37	-0.64	0.57	0.6	-1.29	-0.96	1.64	2.87	-0.92
02	2018	C	winter	NA	NA	NA	NA	NA	NA	NA	NA	NA	NA	NA	NA	NA	NA	NA	NA	NA	1.26	1.17	NA	NA	-0.1	0.09	2.52	-1.85
03	2018	C	spring	NA	NA	NA	NA	NA	NA	NA	NA	NA	NA	NA	NA	NA	NA	NA	NA	NA	-0.64	NA	NA	NA	0.55	1.17	1.63	-1.09
04	2018	C	spring	0.46	0.04	0.87	-0.76	0.67	0.77	0.89	0.42	-1.58	NA	1.42	-0.2	1.73	0.11	-0.55	NA	-0.23	-0.87	-0.26	-1.38	-0.53	0.41	0.1	0.97	-0.12
05	2018	C	spring	NA	NA	NA	NA	NA	NA	NA	NA	NA	NA	NA	NA	NA	NA	NA	NA	NA	NA	-0.64	NA	NA	0.76	-0.32	0.09	0.4
06	2018	C	summer	NA	NA	NA	NA	NA	NA	NA	NA	NA	NA	NA	NA	NA	NA	NA	NA	NA	-1.44	NA	NA	NA	-0.67	1.77	0.48	1.22
07	2018	C	summer	NA	-0.22	2.12	-0.36	-0.37	-0.01	0.65	2.56	-1.25	-0.49	0.53	0.78	0.3	0.45	0.41	-0.13	-0.73	0.11	1.98	NA	NA	-0.24	-0.92	-0.6	1.51
08	2018	C	summer	NA	NA	NA	NA	NA	NA	NA	NA	NA	NA	NA	NA	NA	NA	NA	NA	NA	3.37	NA	NA	NA	-0.38	-0.04	-0.84	1.26
09	2018	C	autumn	NA	NA	NA	NA	NA	NA	NA	NA	NA	NA	NA	NA	NA	NA	NA	NA	NA	-1.24	NA	NA	NA	-0.24	-1.51	-0.84	0.81
10	2018	C	autumn	NA	-0.42	0.24	0.51	-0.14	-0.02	0.53	1.35	-1.83	NA	0.43	-0.96	-0.04	NA	-0.36	NA	-0.31	-0.7	NA	NA	NA	0.26	-0.63	-0.85	0.11
11	2018	C	autumn	NA	NA	NA	NA	NA	NA	NA	NA	NA	NA	NA	NA	NA	NA	NA	NA	NA	-0.66	-0.02	NA	NA	-0.38	0.24	-0.61	-0.94
12	2018	C	winter	NA	NA	NA	NA	NA	NA	NA	NA	NA	NA	NA	NA	NA	NA	NA	NA	NA	0.76	-0.52	NA	NA	-0.38	2.18	0.01	-0.94
01	2019	C	winter	-0.32	-0.33	-0.31	0.34	0.95	0.18	0.01	0.04	NA	-0.29	0.16	-2.18	0.01	-0.1	-0.6	-0.14	1.1	0.59	-0.02	-0.25	-0.28	1.27	-0.6	-0.31	-1.48
03	2019	C	spring	NA	NA	NA	NA	NA	NA	NA	NA	NA	NA	NA	NA	NA	NA	NA	NA	NA	0.87	-0.12	NA	NA	1.48	-0.12	0.06	-0.68
04	2019	C	spring	-2.31	0.5	0.75	1.63	1.04	0.31	0.45	-0.9	-1.91	0.19	0.98	-1.19	0.29	-0.1	0.25	-0.14	2.39	0.31	NA	-1.42	1.63	0.48	-0.25	-0.47	-0.35
05	2019	C	spring	NA	NA	NA	NA	NA	NA	NA	NA	NA	NA	NA	NA	NA	NA	NA	NA	NA	0.31	NA	NA	NA	-0.17	0.21	-0.48	-0.1
06	2019	C	summer	NA	NA	NA	NA	NA	NA	NA	NA	NA	NA	NA	NA	NA	NA	NA	NA	NA	-0.13	NA	NA	NA	-0.6	0.21	-0.66	0.73
07	2019	C	summer	-1.16	-0.42	0.06	-0.74	-0.93	-0.59	-0.81	-1.01	-1.53	-0.47	-0.7	-0.05	-1.08	1.18	-0.53	-0.14	-0.87	-0.38	NA	NA	NA	-0.89	-0.57	-0.9	1.55
10	2019	C	autumn	-0.51	-0.62	0.16	NA	0.09	0.01	0.87	-0.71	-1.94	-0.06	0.87	-1.28	0.39	1.73	-0.41	-0.14	-0.78	NA	NA	-0.36	0.07	-0.31	1.78	-0.8	0.73
