# Supplementary material for: Seasonal dynamics of mudflat foraminifera linked to diatom species and traits
Source: Copernicus journal article supplement (doi:10.5194/jm-45-51-2026), 2026-01-15
Supplement: Supplementary file 2 [file Table S3 - seasonal environmental variations.pdf › Supplements/Table S3 - seasonal environmental variations.pdf]

**Table S3: Seasonal Variations in Environmental Variables – Statistical Tests (ANOVA or Kruskal-Wallis), Significance Levels ( $p < 0.001$  (\*\*\*),  $p < 0.01$  (\*\*),  $p < 0.05$  (\*),  $p \geq 0.05$  (NS)), and post-hoc comparisons (Tukey or Dunn).**

| Variables                    | Test (ANOVA/KW) | Significance | Post-hoc tests (Tukey/Dunn)                                                         |
|------------------------------|-----------------|--------------|-------------------------------------------------------------------------------------|
| Temperature                  | KW              | ***          | autumn < summer; spring < summer; autumn > winter; spring > winter; summer > winter |
| Loire discharge              | KW              | ***          | autumn < spring; spring > summer; autumn < winter; summer < winter                  |
| Tidal                        | KW              | NS           |                                                                                     |
| DOU                          | KW              | *            | summer > winter                                                                     |
| Granulometry                 | KW              | NS           |                                                                                     |
| NDVI                         | KW              | *            | spring < winter                                                                     |
| NO <sub>2</sub> <sup>-</sup> | KW              | *            | spring > winter                                                                     |
| N:P                          | KW              | NS           |                                                                                     |
| NH <sub>4</sub> <sup>+</sup> | KW              | *            | autumn > spring                                                                     |
| Alcalinity                   | ANOVA           | ***          | summer > autumn; winter < autumn; summer > spring; winter < spring; winter < summer |
| Si                           | KW              | **           | summer > winter                                                                     |
| P                            | KW              | *            | summer > winter                                                                     |
| Mn                           | KW              | *            | summer > winter                                                                     |
| Li                           | KW              | *            | autumn > summer                                                                     |
| Fe                           | KW              | NS           |                                                                                     |
| Ca                           | KW              | ***          | spring < summer; summer > winter                                                    |
| Ba                           | KW              | ***          | spring > winter; summer > winter                                                    |
| Porosity                     | KW              | *            | summer < spring; winter > summer                                                    |
