# Supplementary material for: Seasonal dynamics of mudflat foraminifera linked to diatom species and traits
Source: Copernicus journal article supplement (doi:10.5194/jm-45-51-2026), 2026-01-15
Supplement: Supplementary file 2 [file Table S4 - diatoms data.xlsx]

## Sheet: Diatoms species and traits
Species > 5%	Life-forms	Size-classes	Shapes
Chaetoceros sp.	Pelagic	Large	Prism on elliptic base
Cylindrotheca sp.	Tychopelagic	Medium	Prolate spheroid with cylinders
Cymatosira belgica	Tychopelagic	Small	Prism on parallelogram base
Entomoneis paludosa	Epipelic	Large	Prism on elliptic base
Eutonogramma dubium	Epipsammic	Large	Half-elliptic prism
Gyrosigma fasciola	Epipelic	Large	Prism on parallelogram base
Gyrosigma limosum	Epipelic	Large	Prism on parallelogram base
Gyrosigma wansbeckii	Epipelic	Large	Prism on parallelogram base
Halamphora sp.	Epipelic	Medium	Cymbelloid
Melosira sp.	Pelagic	Large	Cylinder
Navicula abscondita	Epipelic	Large	Prism on elliptic base
Navicula cf. flagellifera	Epipelic	Large	Prism on elliptic base
Navicula meuleumansii	Epipelic	Large	Prism on elliptic base
Navicula spartinetensis	Epipelic	Large	Prism on elliptic base
Nitzschia cf. aequorea	Epipelic	Medium	Prism on parallelogram base
Nitzschia cf. distans	Epipelic	Medium	Prism on parallelogram base
Nitzschia maxima	Epipelic	Medium	Prism on parallelogram base
Plagiogrammopsis vanheurckii	Epipsammic Tychopelagic	Medium	Prism on elliptic base
Plagiotropis seriata	Epipelic	Large	Prism on elliptic base
Plagiotropis vanheurckii	Epipelic	Large	Prism on elliptic base
Planothidium septentrionalis	Epipsammic	Small	Prism on elliptic base
Pleurosigma aestuarii	Epipelic	Large	Prism on parallelogram base
Pleurosigma angulatum	Epipelic	Large	Prism on parallelogram base
Podosira stelligera	Pelagic	Large	Cylinder with half-spheres
Psammodictyion sp.	Epipsammic	Medium	Prism on elliptic base
Skeletonema sp.	Pelagic	Small	Cylinder with half-spheres
Staurophora salina	Epipelic	Large	Prism on elliptic base
Thalassiosira sp.	Pelagic Tychopelagic	Medium	Cylinder

## Sheet: Diatoms Raw data
Months	Years	Seasons	Nav.meu	Gyr.lim	Ple.aes	Ple.ang	Nav.spa	Gyr.wan	Nav.abs	Sta.sal	Nit.aquo	Mel.sp	Plagiotr.ser	Gyr.fas	Nit.dis	Nit.max	Ent.pal	Nav.fla	Hal.sp	Plagiotr.va	Psa.sp	Pla.sep	Eut.dub	Plagiogr.va	Cym.bel	Cyl.sp	Tha.sp	Cha.sp	Pod.ste	Ske.sp	Others	Sum
3	2017	spring	33	3	159	36	3	3	0	0	15	0	0	0	0	0	0	0	0	15	3	0	0	3	6	0	3	0	0	0	15	297
4	2017	spring	15	15	198	15	24	18	12	0	36	12	0	3	9	0	0	0	6	15	3	0	6	9	3	0	21	81	3	0	51	555
5	2017	spring	60	135	0	3	0	39	207	0	0	3	0	0	0	3	9	0	0	0	9	0	0	12	3	0	3	6	0	0	30	522
6	2017	summer	45	12	30	6	21	21	21	189	0	0	12	0	12	0	0	9	30	0	3	0	3	12	3	3	3	0	9	0	30	474
7	2017	summer	84	93	9	0	39	9	6	9	9	6	0	0	3	3	120	0	9	3	18	0	15	33	3	21	18	3	0	0	111	624
8	2017	summer	90	3	81	42	12	33	0	3	9	0	0	0	0	6	3	27	0	3	15	0	0	27	6	0	48	0	6	0	123	537
9	2017	autumn	174	9	12	12	3	6	3	0	3	0	6	0	21	0	0	3	0	0	6	0	3	15	6	6	36	0	9	0	54	387
10	2017	autumn	0	12	3	12	0	0	0	0	36	9	0	3	3	0	0	0	0	0	36	21	0	18	30	0	81	0	9	0	99	372
1	2018	winter	81	27	9	57	9	6	6	0	60	0	0	0	12	9	0	0	0	6	6	66	0	9	6	0	12	0	3	0	66	450
2	2018	winter	147	258	0	6	12	9	3	0	0	0	0	0	3	0	0	3	0	0	3	3	0	0	0	60	6	0	0	0	21	534
3	2018	spring	177	96	0	0	24	48	30	3	0	0	0	0	0	0	0	0	0	0	9	0	6	3	3	0	21	3	0	0	9	432
4	2018	spring	168	36	0	9	15	18	18	0	0	96	0	0	3	0	0	0	0	0	6	0	0	6	6	0	0	105	0	0	27	513
5	2018	spring	39	33	0	3	72	33	33	6	0	3	0	0	0	0	0	0	0	0	9	0	0	33	0	0	36	84	6	0	51	441
6	2018	summer	69	30	30	9	30	57	12	6	6	36	3	0	0	3	0	0	3	12	21	0	0	30	6	0	21	51	3	30	63	531
7	2018	summer	0	33	9	6	21	21	45	51	21	0	33	0	9	3	0	0	3	3	0	0	30	93	9	0	24	6	15	0	60	495
8	2018	summer	9	0	0	0	0	0	0	0	0	0	42	0	0	0	3	30	0	0	24	9	18	93	12	0	39	3	12	0	99	393
9	2018	autumn	0	3	0	57	6	0	3	6	0	0	6	0	0	0	3	9	0	0	9	0	15	90	3	0	33	6	6	0	69	324
10	2018	autumn	15	3	15	174	33	3	21	3	3	0	3	9	6	0	0	3	0	6	3	0	0	36	0	3	21	0	0	0	63	423
11	2018	autumn	12	0	102	0	3	0	6	0	3	3	3	6	3	15	0	9	0	0	6	0	12	39	0	0	3	9	18	6	48	306
12	2018	winter	12	18	147	84	42	24	12	0	0	0	0	60	3	21	0	15	9	0	9	0	0	9	3	0	3	3	0	0	87	561
1	2019	winter	54	39	27	54	42	75	30	3	0	0	3	30	6	45	0	0	0	0	6	0	0	0	0	0	6	0	0	0	27	447
2	2019	winter	45	12	294	36	45	12	0	0	0	0	3	24	6	3	0	0	0	0	3	0	0	3	6	0	6	0	0	0	30	528
3	2019	spring	33	12	354	39	33	18	0	0	0	0	6	27	18	0	0	0	0	0	0	0	0	0	6	0	6	0	3	0	18	573
4	2019	spring	87	30	135	12	36	9	9	3	15	9	0	0	9	0	0	12	3	0	12	0	9	9	9	0	3	0	0	0	36	447
5	2019	spring	57	42	36	15	24	45	15	6	6	48	9	0	6	3	6	0	9	21	21	0	6	33	9	0	27	57	9	33	126	669
6	2019	summer	0	30	15	6	30	21	42	51	18	0	39	6	12	3	6	0	6	9	6	6	30	78	9	0	27	6	18	6	102	582
7	2019	summer	60	75	21	0	45	9	6	12	15	6	6	0	3	9	108	6	9	3	24	6	21	27	9	18	27	9	6	0	180	720

## Sheet: Diatoms Relative abundance
Months	Years	Seasons	Nav.meu	Gyr.lim	Ple.aes	Ple.ang	Nav.spa	Gyr.wan	Nav.abs	Sta.sal	Nit.aquo	Mel.sp	Plagiotr.ser	Gyr.fas	Nit.dis	Nit.max	Ent.pal	Nav.fla	Hal.sp	Plagiotr.va	Psa.sp	Pla.sep	Eut.dub	Plagiogr.va	Cym.bel	Cyl.sp	Tha.sp	Cha.sp	Pod.ste	Ske.sp	Others	Sum
3	2017	spring	11.1111	1.0101	53.5354	12.1212	1.0101	1.0101	0	0	5.05051	0	0	0	0	0	0	0	0	5.05051	1.0101	0	0	1.0101	2.0202	0	1.0101	0	0	0	5.05051	100
4	2017	spring	2.7027	2.7027	35.6757	2.7027	4.32432	3.24324	2.16216	0	6.48649	2.16216	0	0.540541	1.62162	0	0	0	1.08108	2.7027	0.540541	0	1.08108	1.62162	0.540541	0	3.78378	14.5946	0.540541	0	9.18919	100
5	2017	spring	11.4943	25.8621	0	0.574713	0	7.47126	39.6552	0	0	0.574713	0	0	0	0.574713	1.72414	0	0	0	1.72414	0	0	2.29885	0.574713	0	0.574713	1.14943	0	0	5.74713	100
6	2017	summer	9.49367	2.53165	6.32911	1.26582	4.43038	4.43038	4.43038	39.8734	0	0	2.53165	0	2.53165	0	0	1.89873	6.32911	0	0.632911	0	0.632911	2.53165	0.632911	0.632911	0.632911	0	1.89873	0	6.32911	100
7	2017	summer	13.4615	14.9038	1.44231	0	6.25	1.44231	0.961538	1.44231	1.44231	0.961538	0	0	0.480769	0.480769	19.2308	0	1.44231	0.480769	2.88462	0	2.40385	5.28846	0.480769	3.36538	2.88462	0.480769	0	0	17.7885	100
8	2017	summer	16.7598	0.558659	15.0838	7.82123	2.23464	6.14525	0	0.558659	1.67598	0	0	0	0	1.11732	0.558659	5.02793	0	0.558659	2.7933	0	0	5.02793	1.11732	0	8.93855	0	1.11732	0	22.905	100
9	2017	autumn	44.9612	2.32558	3.10078	3.10078	0.775194	1.55039	0.775194	0	0.775194	0	1.55039	0	5.42636	0	0	0.775194	0	0	1.55039	0	0.775194	3.87597	1.55039	1.55039	9.30233	0	2.32558	0	13.9535	100
10	2017	autumn	0	3.22581	0.806452	3.22581	0	0	0	0	9.67742	2.41935	0	0.806452	0.806452	0	0	0	0	0	9.67742	5.64516	0	4.83871	8.06452	0	21.7742	0	2.41935	0	26.6129	100
1	2018	winter	18	6	2	12.6667	2	1.33333	1.33333	0	13.3333	0	0	0	2.66667	2	0	0	0	1.33333	1.33333	14.6667	0	2	1.33333	0	2.66667	0	0.666667	0	14.6667	100
2	2018	winter	27.5281	48.3146	0	1.1236	2.24719	1.68539	0.561798	0	0	0	0	0	0.561798	0	0	0.561798	0	0	0.561798	0.561798	0	0	0	11.236	1.1236	0	0	0	3.93258	100
3	2018	spring	40.9722	22.2222	0	0	5.55556	11.1111	6.94444	0.694444	0	0	0	0	0	0	0	0	0	0	2.08333	0	1.38889	0.694444	0.694444	0	4.86111	0.694444	0	0	2.08333	100
4	2018	spring	32.7485	7.01754	0	1.75439	2.92398	3.50877	3.50877	0	0	18.7135	0	0	0.584795	0	0	0	0	0	1.16959	0	0	1.16959	1.16959	0	0	20.4678	0	0	5.26316	100
5	2018	spring	8.84354	7.48299	0	0.680272	16.3265	7.48299	7.48299	1.36054	0	0.680272	0	0	0	0	0	0	0	0	2.04082	0	0	7.48299	0	0	8.16327	19.0476	1.36054	0	11.5646	100
6	2018	summer	12.9944	5.64972	5.64972	1.69492	5.64972	10.7345	2.25989	1.12994	1.12994	6.77966	0.564972	0	0	0.564972	0	0	0.564972	2.25989	3.9548	0	0	5.64972	1.12994	0	3.9548	9.60452	0.564972	5.64972	11.8644	100
7	2018	summer	0	6.66667	1.81818	1.21212	4.24242	4.24242	9.09091	10.303	4.24242	0	6.66667	0	1.81818	0.606061	0	0	0.606061	0.606061	0	0	6.06061	18.7879	1.81818	0	4.84848	1.21212	3.0303	0	12.1212	100
8	2018	summer	2.29008	0	0	0	0	0	0	0	0	0	10.687	0	0	0	0.763359	7.63359	0	0	6.10687	2.29008	4.58015	23.6641	3.05344	0	9.92366	0.763359	3.05344	0	25.1908	100
9	2018	autumn	0	0.925926	0	17.5926	1.85185	0	0.925926	1.85185	0	0	1.85185	0	0	0	0.925926	2.77778	0	0	2.77778	0	4.62963	27.7778	0.925926	0	10.1852	1.85185	1.85185	0	21.2963	100
10	2018	autumn	3.5461	0.70922	3.5461	41.1348	7.80142	0.70922	4.96454	0.70922	0.70922	0	0.70922	2.12766	1.41844	0	0	0.70922	0	1.41844	0.70922	0	0	8.51064	0	0.70922	4.96454	0	0	0	14.8936	100
11	2018	autumn	3.92157	0	33.3333	0	0.980392	0	1.96078	0	0.980392	0.980392	0.980392	1.96078	0.980392	4.90196	0	2.94118	0	0	1.96078	0	3.92157	12.7451	0	0	0.980392	2.94118	5.88235	1.96078	15.6863	100
12	2018	winter	2.13904	3.20856	26.2032	14.9733	7.48663	4.27807	2.13904	0	0	0	0	10.6952	0.534759	3.74332	0	2.6738	1.60428	0	1.60428	0	0	1.60428	0.534759	0	0.534759	0.534759	0	0	15.508	100
1	2019	winter	12.0805	8.72483	6.04027	12.0805	9.39597	16.7785	6.71141	0.671141	0	0	0.671141	6.71141	1.34228	10.0671	0	0	0	0	1.34228	0	0	0	0	0	1.34228	0	0	0	6.04027	100
2	2019	winter	8.52273	2.27273	55.6818	6.81818	8.52273	2.27273	0	0	0	0	0.568182	4.54545	1.13636	0.568182	0	0	0	0	0.568182	0	0	0.568182	1.13636	0	1.13636	0	0	0	5.68182	100
3	2019	spring	5.75916	2.09424	61.7801	6.80628	5.75916	3.14136	0	0	0	0	1.04712	4.71204	3.14136	0	0	0	0	0	0	0	0	0	1.04712	0	1.04712	0	0.52356	0	3.14136	100
4	2019	spring	19.4631	6.71141	30.2013	2.68456	8.05369	2.01342	2.01342	0.671141	3.3557	2.01342	0	0	2.01342	0	0	2.68456	0.671141	0	2.68456	0	2.01342	2.01342	2.01342	0	0.671141	0	0	0	8.05369	100
5	2019	spring	8.52018	6.27803	5.38117	2.24215	3.58744	6.72646	2.24215	0.896861	0.896861	7.17489	1.34529	0	0.896861	0.44843	0.896861	0	1.34529	3.13901	3.13901	0	0.896861	4.93274	1.34529	0	4.03587	8.52018	1.34529	4.93274	18.8341	100
6	2019	summer	0	5.15464	2.57732	1.03093	5.15464	3.60825	7.21649	8.76289	3.09278	0	6.70103	1.03093	2.06186	0.515464	1.03093	0	1.03093	1.54639	1.03093	1.03093	5.15464	13.4021	1.54639	0	4.63918	1.03093	3.09278	1.03093	17.5258	100
7	2019	summer	8.33333	10.4167	2.91667	0	6.25	1.25	0.833333	1.66667	2.08333	0.833333	0.833333	0	0.416667	1.25	15	0.833333	1.25	0.416667	3.33333	0.833333	2.91667	3.75	1.25	2.5	3.75	1.25	0.833333	0	25	100
																					Relative abundance of the diatom species. The main species discussed in the manuscript related to foraminifera dynamics are colorful.

## Sheet: Diatoms Traits
Months	Years	Seasons	Epipelic	Epipsammic	Pelagic	Tychopelagic	Small	Medium	Large	Prism.on.elliptic.base	Cymbelloid	Prolate.spheroid .2.cylinders	Half.elliptic.prism	Cylinder	Cylinder.2 half.spheres	Prism.on.parallelogram.base
3	2017	spring	89.899	2.0202	1.0101	2.0202	2.0202	8.08081	84.8485	19.1919	0	0	0	1.0101	0	74.7475
4	2017	spring	65.9459	3.24324	21.0811	0.540541	0.540541	15.1351	75.1351	28.6486	1.08108	0	1.08108	5.94595	0.540541	53.5135
5	2017	spring	87.3563	4.02299	2.29885	0.574713	0.574713	5.17241	88.5057	58.046	0	0	0	1.14943	0	35.0575
6	2017	summer	86.0759	3.79747	2.53165	1.26582	0.632911	13.2911	79.7468	65.8228	6.32911	0.632911	0.632911	0.632911	1.89873	17.7215
7	2017	summer	63.4615	10.5769	4.32692	3.84615	0.480769	18.2692	63.4615	50.4808	1.44231	3.36538	2.40385	3.84615	0	20.6731
8	2017	summer	58.1006	7.82123	10.0559	1.11732	1.11732	19.5531	56.4246	33.5196	0	0	0	8.93855	1.11732	33.5196
9	2017	autumn	65.1163	6.20155	11.6279	3.10078	1.55039	22.4806	62.0155	54.2636	0	1.55039	0.775194	9.30233	2.32558	17.8295
10	2017	autumn	18.5484	20.1613	26.6129	8.06452	13.7097	46.7742	12.9032	20.1613	0	0	0	24.1935	2.41935	26.6129
1	2018	winter	62.6667	18	3.33333	1.33333	16	24	45.3333	40.6667	0	0	0	2.66667	0.666667	41.3333
2	2018	winter	82.5843	1.1236	1.1236	11.236	0.561798	13.4831	82.0225	32.0225	0	11.236	0	1.1236	0	51.6854
3	2018	spring	87.5	4.16667	5.55556	0.694444	0.694444	7.63889	89.5833	57.6389	0	0	1.38889	4.86111	0	34.0278
4	2018	spring	52.0468	2.33918	39.1813	1.16959	1.16959	2.92398	90.6433	61.9883	0	0	0	18.7135	0	14.0351
5	2018	spring	49.6599	9.52381	29.2517	0	0	17.6871	70.7483	62.585	0	0	0	8.84354	1.36054	15.6463
6	2018	summer	50.8475	9.60452	26.5537	1.12994	6.77966	15.8192	65.5367	44.0678	0.564972	0	0	10.7345	6.21469	26.5537
7	2018	summer	52.1212	24.8485	9.09091	1.81818	1.81818	30.9091	55.1515	50.9091	0.606061	0	6.06061	4.84848	3.0303	22.4242
8	2018	summer	21.374	36.6412	13.7405	3.05344	5.34351	39.6947	29.771	54.1985	0	0	4.58015	9.92366	3.05344	3.05344
9	2018	autumn	28.7037	35.1852	13.8889	0.925926	0.925926	40.7407	37.037	42.5926	0	0	4.62963	10.1852	1.85185	19.4444
10	2018	autumn	70.2128	9.21986	4.96454	0.70922	0	17.0213	68.0851	29.078	0	0.70922	0	4.96454	0	50.3546
11	2018	autumn	52.9412	18.6275	12.7451	0	1.96078	22.549	59.8039	28.4314	0	0	3.92157	1.96078	7.84314	42.1569
12	2018	winter	79.6791	3.20856	1.06952	0.534759	0.534759	9.62567	74.3316	18.1818	1.60428	0	0	0.534759	0	64.1711
1	2019	winter	91.2752	1.34228	1.34228	0	0	14.094	79.8658	30.8725	0	0	0	1.34228	0	61.745
2	2019	winter	90.9091	1.13636	1.13636	1.13636	1.13636	3.97727	89.2045	18.75	0	0	0	1.13636	0	74.4318
3	2019	spring	94.2408	0	1.57068	1.04712	1.04712	4.18848	91.623	12.5654	0	0	0	1.04712	0.52356	82.7225
4	2019	spring	80.5369	6.71141	2.68456	2.01342	2.01342	11.4094	78.5235	37.5839	0.671141	0	2.01342	2.68456	0	48.9933
5	2019	spring	44.843	8.96861	26.009	1.34529	6.27803	15.6951	59.1928	37.2197	1.34529	0	0.896861	11.2108	6.27803	24.2152
6	2019	summer	50.5155	20.6186	9.79381	1.54639	3.60825	25.7732	53.0928	46.9072	1.03093	0	5.15464	4.63918	4.12371	20.6186
7	2019	summer	53.75	10.8333	6.66667	3.75	2.08333	18.3333	54.5833	43.3333	1.25	2.5	2.91667	4.58333	0.833333	19.5833

## Sheet: Diatoms Combined traits
Months	Years	Seasons	S.Prism.on.elliptic.base.epipsammic	M.Prism.on.elliptic.base.epipsammic	L.Prism.on.elliptic.base.pelagic	L.Prism.on.elliptic.base.epipelic	S.Prism.on.parallelogram.tychopelagic	M.Prism.on.parallelogram.epipelic	L.Prism.on.parallelogram.epipelic	M.Prolate.spheroid .2.cylinders.tychopelagic	L.Half.elliptic.prism.epipsammic	M.Cymbelloid.epipelic	M.Cylinder.pelagic	L.Cylinder.pelagic	S.Cylinder.2 half.spheres.pelagic	L.Cylinder.2 half.spheres.pelagic
3	2017	spring	0	2	0	6	2	5	68	0	0	0	1	0	0	0
4	2017	spring	0	3	15	9	1	8	46	0	1	1	4	2	0	1
5	2017	spring	0	4	1	42	1	1	34	0	0	0	1	1	0	0
6	2017	summer	0	4	0	53	1	3	14	1	1	6	1	0	0	2
7	2017	summer	0	8	0	27	0	1	17	3	2	1	3	1	0	0
8	2017	summer	0	8	0	10	1	3	30	0	0	0	9	0	0	1
9	2017	autumn	0	6	0	5	2	6	10	2	1	0	9	0	0	2
10	2017	autumn	6	15	0	0	8	11	8	0	0	0	22	2	0	2
1	2018	winter	15	3	0	4	1	18	22	0	0	0	3	0	0	1
2	2018	winter	1	1	0	4	0	1	51	11	0	0	1	0	0	0
3	2018	spring	0	3	1	14	1	0	33	0	1	0	5	0	0	0
4	2018	spring	0	2	20	7	1	1	13	0	0	0	0	19	0	0
5	2018	spring	0	9	19	24	0	0	15	0	0	0	8	1	0	1
6	2018	summer	0	10	10	12	1	2	25	0	0	1	4	7	6	1
7	2018	summer	0	19	1	31	2	7	14	0	6	1	5	0	0	3
8	2018	summer	2	30	1	20	3	0	0	0	5	0	10	0	0	3
9	2018	autumn	0	31	2	11	1	0	19	0	5	0	10	0	0	2
10	2018	autumn	0	10	0	17	0	2	49	1	0	0	5	0	0	0
11	2018	autumn	0	15	3	7	0	7	35	0	4	0	1	1	2	6
12	2018	winter	0	4	1	12	1	5	59	0	0	2	1	0	0	0
1	2019	winter	0	1	0	18	0	11	51	0	0	0	1	0	0	0
2	2019	winter	0	2	0	10	1	2	72	0	0	0	1	0	0	0
3	2019	spring	0	0	0	7	1	3	79	0	0	0	1	0	0	1
4	2019	spring	0	5	0	14	2	5	42	0	2	1	1	2	0	0
5	2019	spring	0	8	9	12	1	2	20	0	1	1	4	7	5	1
6	2019	summer	1	14	1	31	2	6	14	0	5	1	5	0	1	3
7	2019	summer	1	7	1	26	1	3	14	3	3	1	4	1	0	1
