# Supplementary material for: Seasonal dynamics of mudflat foraminifera linked to diatom species and traits
Source: Copernicus journal article supplement (doi:10.5194/jm-45-51-2026), 2026-01-15
Supplement: Supplementary file 3 [file Table S5 - spearman diatoms environment.xlsx]

## Sheet: spearman diat. species
Species	Nav.meu	Gyr.lim	Ple.aes	Ple.ang	Nav.spa	Gyr.wan	Nav.abs	Sta.sal	Nit.aquo	Mel.sp	Plagiotr.ser	Gyr.fas	Nit.dis	Nit.max	Ent.pal	Nav.fla	Hal.sp	Plagiotr.va	Psa.sp	Pla.sep	Eut.dub	Plagiogr.va	Cym.bel	Cyl.sp	Tha.sp	Cha.sp	Pod.ste	Ske.sp	Others
Porosity									-0.59									-0.66
Ba
Ca																	0.56				0.62	0.61
Li
Mn
P									-0.63						0.57
Si					-0.55							-0.54
Alcalinity	-0.79			-0.75													0.71				0.78	0.82	0.74		0.73		0.74
NH4+					-0.61
NO2-						-0.58					-0.67			-0.73
NDVI										-0.63	0.44					0.41										-0.53
Loire	0.57	0.39				0.41					-0.62				-0.52						-0.59	-0.68			-0.52		-0.52		-0.69
Temp								0.57			0.54	-0.42			0.59		0.44				0.55	0.72			0.49		0.51		0.51

## Sheet: spearman diat. independ. traits
Traits	Epipelic	Epipsammic	Pelagic	Tychopelagic	Small	Medium	Large	Prism.on.elliptic.base	Cymbelloid	Prolate.spheroid .2.cylinders	Half.elliptic.prism	Cylinder	Cylinder.2 half.spheres	Prism.on.parallelogram.base
Porosity		-0.64
Ba
Ca									0.56		0.62
Li			0.54
Mn
P			-0.6									-0.67
Si
Alcalinity		-0.71		0.82					0.71		0.78		0.75
NH4+
NO2-
NDVI			-0.46
Loire	0.42	-0.57				-0.59	0.59				-0.59		-0.43
Temp	-0.57	0.64	0.46			0.49	-0.5	0.51	0.44		0.55	0.46	0.53	-0.68

## Sheet: spearman diat. combined traits
Combined traits	S.Prism.on.elliptic.base.epipsammic	M.Prism.on.elliptic.base.epipsammic	L.Prism.on.elliptic.base.pelagic	L.Prism.on.elliptic.base.epipelic	S.Prism.on.parallelogram.tychopelagic	M.Prism.on.parallelogram.epipelic	L.Prism.on.parallelogram.epipelic	M.Prolate.spheroid .2.cylinders.tychopelagic	L.Half.elliptic.prism.epipsammic	M.Cymbelloid.epipelic	M.Cylinder.pelagic	L.Cylinder.pelagic	S.Cylinder.2 half.spheres.pelagic	L.Cylinder.2 half.spheres.pelagic
Porosity
Ba
Ca		0.54		0.57					0.62	0.56
Li
Mn
P
Si
Alcalinity		0.76			0.74				0.78	0.71	0.73			0.74
NH4+				-0.63
NO2-
NDVI			-0.53									-0.63
Loire		-0.68					0.45		-0.59		-0.52			-0.51
Temp		0.68		0.58			-0.66		0.55	0.44	0.49			0.5
