# Supplementary material for: Seasonal dynamics of mudflat foraminifera linked to diatom species and traits
Source: Copernicus journal article supplement (doi:10.5194/jm-45-51-2026), 2026-01-15
Supplement: Supplementary file 4 [file Table S6- foraminifera data.xlsx]

## Sheet: forams raw data
Stations	Seasons	Years	Months	Volume	AC	HG	EO	ES	Total
A	spring	2016	3	51.5	1113.43	732.33	36.05	0	1881.81
A	spring	2016	4	51.5	704.52	464.53	22.66	1.03	1192.74
A	spring	2016	5	51.5	866.23	108.15	7.21	228.66	1210.25
A	summer	2016	6	51.5	159.65	64.89	10.3	24.72	259.56
A	summer	2016	7	51.5	116.39	22.66	9.27	105.06	253.38
A	summer	2016	8	51.5	244.11	220.42	69.01	106.09	639.63
A	autumn	2016	9	51.5	140.08	28.84	35.02	35.02	238.96
A	autumn	2016	10	51.5	596.37	118.45	149.35	6.18	870.35
A	autumn	2016	11	51.5	414.06	164.8	96.82	10.3	685.98
A	winter	2016	12	51.5	539.72	394.49	79.31	29.87	1043.39
A	winter	2017	1	51.5	106.09	85.49	24.72	8.24	224.54
A	winter	2017	2	51.5	54.59	55.62	0	0	110.21
A	spring	2017	3	51.5	120.51	80.34	8.24	14.42	223.51
A	spring	2017	4	51.5	114.33	31.93	9.27	20.6	176.13
A	spring	2017	5	51.5	120.51	28.84	9.27	90.64	249.26
A	summer	2017	6	51.5	376.98	332.69	51.5	55.62	816.79
A	summer	2017	7	51.5	141.11	230.72	52.53	43.26	467.62
A	summer	2017	8	51.5	NA	NA	NA	NA	NA
A	autumn	2017	9	51.5	268.83	140.08	169.95	4.12	582.98
A	autumn	2017	10	51.5	503.67	208.06	155.53	0	867.26
A	autumn	2017	11	51.5	NA	NA	NA	NA	NA
A	winter	2017	12	51.5	NA	NA	NA	NA	NA
A	winter	2018	1	51.5	248.23	365.65	31.93	0	645.81
A	winter	2018	2	51.5	668.47	847.69	23.69	0	1539.85
A	spring	2018	3	51.5	45.32	10.3	0	3.09	58.71
A	spring	2018	4	51.5	114.33	123.6	12.36	6.18	256.47
A	spring	2018	5	51.5	312.09	112.27	104.03	40.17	568.56
A	summer	2018	6	51.5	112.27	52.53	2.06	141.11	307.97
A	summer	2018	7	51.5	127.72	203.94	23.69	82.4	437.75
A	summer	2018	8	51.5	807.52	688.04	1119.61	55.62	2670.79
A	autumn	2018	9	51.5	371.83	214.24	388.31	6.18	980.56
A	autumn	2018	10	51.5	208.06	172.01	183.34	19.57	582.98
A	autumn	2018	11	51.5	358.44	590.19	138.02	17.51	1104.16
A	winter	2018	12	51.5	183.34	263.68	43.26	2.06	492.34
A	winter	2019	1	51.5	43.26	165.83	10.3	11.33	230.72
A	winter	2019	2	51.5	NA	NA	NA	NA	NA
A	spring	2019	3	51.5	208.06	383.16	56.65	9.27	657.14
A	spring	2019	4	51.5	56.65	58.71	7.21	5.15	127.72
A	spring	2019	5	51.5	115.36	49.44	7.21	15.45	187.46
A	summer	2019	6	51.5	81.37	86.52	17.51	0	185.4
A	summer	2019	7	51.5	248.23	668.47	371.83	0	1288.53
A	summer	2019	8	51.5	NA	NA	NA	NA	NA
A	autumn	2019	9	51.5	NA	NA	NA	NA	NA
A	autumn	2019	10	51.5	248.23	420.24	679.8	0	1348.27
B	spring	2016	3	51.5	1202.01	775.59	21.63	0	1999.23
B	spring	2016	4	51.5	163.77	44.29	4.12	0	212.18
B	spring	2016	5	51.5	885.8	363.59	6.18	301.79	1557.36
B	summer	2016	6	51.5	162.74	40.17	3.09	23.69	229.69
B	summer	2016	7	51.5	190.55	93.73	3.09	96.82	384.19
B	summer	2016	8	51.5	84.46	316.21	48.41	72.1	521.18
B	autumn	2016	9	51.5	407.88	378.01	193.64	0	979.53
B	autumn	2016	10	51.5	388.31	571.65	80.34	51.5	1091.8
B	autumn	2016	11	51.5	596.37	751.9	104.03	23.69	1475.99
B	winter	2016	12	51.5	44.29	66.95	18.54	11.33	141.11
B	winter	2017	1	51.5	427.45	581.95	27.81	6.18	1043.39
B	winter	2017	2	51.5	25.75	54.59	1.03	6.18	87.55
B	spring	2017	3	51.5	190.55	120.51	40.17	22.66	373.89
B	spring	2017	4	51.5	125.66	47.38	12.36	11.33	196.73
B	spring	2017	5	51.5	362.56	84.46	26.78	167.89	641.69
B	summer	2017	6	51.5	340.93	293.55	90.64	76.22	801.34
B	summer	2017	7	51.5	210.12	322.39	103	113.3	748.81
B	summer	2017	8	51.5	NA	NA	NA	NA	NA
B	autumn	2017	9	51.5	1176.26	872.41	639.63	0	2688.3
B	autumn	2017	10	51.5	734.39	248.23	163.77	0	1146.39
B	autumn	2017	11	51.5	NA	NA	NA	NA	NA
B	winter	2017	12	51.5	NA	NA	NA	NA	NA
B	winter	2018	1	51.5	104.03	164.8	4.12	10.3	283.25
B	winter	2018	2	51.5	167.89	138.02	38.11	19.57	363.59
B	spring	2018	3	51.5	131.84	117.42	8.24	4.12	261.62
B	spring	2018	4	51.5	172.01	108.15	23.69	8.24	312.09
B	spring	2018	5	51.5	159.65	67.98	19.57	76.22	323.42
B	summer	2018	6	51.5	103	46.35	1.03	98.88	249.26
B	summer	2018	7	51.5	191.58	138.02	97.85	29.87	457.32
B	summer	2018	8	51.5	607.7	1131.97	575.77	80.34	2395.78
B	autumn	2018	9	51.5	139.05	167.89	140.08	14.42	461.44
B	autumn	2018	10	51.5	10.3	49.44	10.3	8.24	78.28
B	autumn	2018	11	51.5	19.57	103	95.79	10.3	228.66
B	winter	2018	12	51.5	60.77	139.05	47.38	57.68	304.88
B	winter	2019	1	51.5	38.11	156.56	7.21	13.39	215.27
B	winter	2019	2	51.5	NA	NA	NA	NA	NA
B	spring	2019	3	51.5	10.3	14.42	5.15	0	29.87
B	spring	2019	4	51.5	22.66	27.81	1.03	24.72	76.22
B	spring	2019	5	51.5	64.89	28.84	3.09	20.6	117.42
B	summer	2019	6	51.5	67.98	106.09	36.05	8.24	218.36
B	summer	2019	7	51.5	165.83	401.7	293.55	0	861.08
B	summer	2019	8	51.5	NA	NA	NA	NA	NA
B	autumn	2019	9	51.5	NA	NA	NA	NA	NA
B	autumn	2019	10	51.5	64.89	191.58	95.79	0	352.26
C	spring	2016	3	51.5	481.01	435.69	13.39	2.06	932.15
C	spring	2016	4	51.5	157.59	93.73	6.18	3.09	260.59
C	spring	2016	5	51.5	1267.93	517.06	15.45	476.89	2277.33
C	summer	2016	6	51.5	111.24	25.75	3.09	11.33	151.41
C	summer	2016	7	51.5	75.19	42.23	4.12	85.49	207.03
C	summer	2016	8	51.5	51.5	90.64	0	92.7	234.84
C	autumn	2016	9	51.5	169.95	128.75	130.81	17.51	447.02
C	autumn	2016	10	51.5	273.98	61.8	141.11	4.12	481.01
C	autumn	2016	11	51.5	322.39	166.86	76.22	0	565.47
C	winter	2016	12	51.5	123.6	157.59	45.32	2.06	328.57
C	winter	2017	1	51.5	107.12	55.62	12.36	0	175.1
C	winter	2017	2	51.5	108.15	256.47	3.09	6.18	373.89
C	spring	2017	3	51.5	139.05	116.39	16.48	2.06	273.98
C	spring	2017	4	51.5	158.62	42.23	2.06	26.78	229.69
C	spring	2017	5	51.5	80.34	20.6	5.15	45.32	151.41
C	summer	2017	6	51.5	430.54	326.51	77.25	69.01	903.31
C	summer	2017	7	51.5	128.75	233.81	58.71	67.98	489.25
C	summer	2017	8	51.5	NA	NA	NA	NA	NA
C	autumn	2017	9	51.5	1552.21	671.56	919.79	80.34	3223.9
C	autumn	2017	10	51.5	1452.3	516.03	216.3	0	2184.63
C	autumn	2017	11	51.5	NA	NA	NA	NA	NA
C	winter	2017	12	51.5	NA	NA	NA	NA	NA
C	winter	2018	1	51.5	188.49	181.28	39.14	0	408.91
C	winter	2018	2	51.5	216.3	511.91	40.17	0	768.38
C	spring	2018	3	51.5	206	154.5	9.27	0	369.77
C	spring	2018	4	51.5	344.02	44.29	0	19.57	407.88
C	spring	2018	5	51.5	NA	NA	NA	NA	NA
C	summer	2018	6	51.5	22.66	9.27	0	13.39	45.32
C	summer	2018	7	51.5	101.97	127.72	59.74	0	289.43
C	summer	2018	8	51.5	1063.99	1076.35	1408.01	99.91	3648.26
C	autumn	2018	9	51.5	291.49	146.26	282.22	2.06	722.03
C	autumn	2018	10	51.5	188.49	97.85	119.48	13.39	419.21
C	autumn	2018	11	51.5	248.23	390.37	123.6	33.99	796.19
C	winter	2018	12	51.5	135.96	295.61	152.44	38.11	622.12
C	winter	2019	1	51.5	54.59	241.02	5.15	17.51	318.27
C	winter	2019	2	51.5	NA	NA	NA	NA	NA
C	spring	2019	3	51.5	159.65	287.37	44.29	15.45	506.76
C	spring	2019	4	51.5	146.26	193.64	21.63	13.39	374.92
C	spring	2019	5	51.5	20.6	13.39	2.06	6.18	42.23
C	summer	2019	6	51.5	42.23	52.53	14.42	2.06	111.24
C	summer	2019	7	51.5	43.26	169.95	85.49	1.03	299.73
C	summer	2019	8	51.5	NA	NA	NA	NA	NA
C	autumn	2019	9	51.5	NA	NA	NA	NA	NA
C	autumn	2019	10	51.5	110.21	89.61	445.99	0	645.81

## Sheet: forams density 50cm-3
Stations	Seasons	Years	Months	Volume	AC	HG	EO	ES	Total
A	spring	2016	3	50	1081	711	35	0	1827
A	spring	2016	4	50	684	451	22	1	1158
A	spring	2016	5	50	841	105	7	222	1175
A	summer	2016	6	50	155	63	10	24	252
A	summer	2016	7	50	113	22	9	102	246
A	summer	2016	8	50	237	214	67	103	621
A	autumn	2016	9	50	136	28	34	34	232
A	autumn	2016	10	50	579	115	145	6	845
A	autumn	2016	11	50	402	160	94	10	666
A	winter	2016	12	50	524	383	77	29	1013
A	winter	2017	1	50	103	83	24	8	218
A	winter	2017	2	50	53	54	0	0	107
A	spring	2017	3	50	117	78	8	14	217
A	spring	2017	4	50	111	31	9	20	171
A	spring	2017	5	50	117	28	9	88	242
A	summer	2017	6	50	366	323	50	54	793
A	summer	2017	7	50	137	224	51	42	454
A	summer	2017	8	50	NA	NA	NA	NA	NA
A	autumn	2017	9	50	261	136	165	4	566
A	autumn	2017	10	50	489	202	151	0	842
A	autumn	2017	11	50	NA	NA	NA	NA	NA
A	winter	2017	12	50	NA	NA	NA	NA	NA
A	winter	2018	1	50	241	355	31	0	627
A	winter	2018	2	50	649	823	23	0	1495
A	spring	2018	3	50	44	10	0	3	57
A	spring	2018	4	50	111	120	12	6	249
A	spring	2018	5	50	303	109	101	39	552
A	summer	2018	6	50	109	51	2	137	299
A	summer	2018	7	50	124	198	23	80	425
A	summer	2018	8	50	784	668	1087	54	2593
A	autumn	2018	9	50	361	208	377	6	952
A	autumn	2018	10	50	202	167	178	19	566
A	autumn	2018	11	50	348	573	134	17	1072
A	winter	2018	12	50	178	256	42	2	478
A	winter	2019	1	50	42	161	10	11	224
A	winter	2019	2	50	NA	NA	NA	NA	NA
A	spring	2019	3	50	202	372	55	9	638
A	spring	2019	4	50	55	57	7	5	124
A	spring	2019	5	50	112	48	7	15	182
A	summer	2019	6	50	79	84	17	0	180
A	summer	2019	7	50	241	649	361	0	1251
A	summer	2019	8	50	NA	NA	NA	NA	NA
A	autumn	2019	9	50	NA	NA	NA	NA	NA
A	autumn	2019	10	50	241	408	660	0	1309
B	spring	2016	3	50	1167	753	21	0	1941
B	spring	2016	4	50	159	43	4	0	206
B	spring	2016	5	50	860	353	6	293	1512
B	summer	2016	6	50	158	39	3	23	223
B	summer	2016	7	50	185	91	3	94	373
B	summer	2016	8	50	82	307	47	70	506
B	autumn	2016	9	50	396	367	188	0	951
B	autumn	2016	10	50	377	555	78	50	1060
B	autumn	2016	11	50	579	730	101	23	1433
B	winter	2016	12	50	43	65	18	11	137
B	winter	2017	1	50	415	565	27	6	1013
B	winter	2017	2	50	25	53	1	6	85
B	spring	2017	3	50	185	117	39	22	363
B	spring	2017	4	50	122	46	12	11	191
B	spring	2017	5	50	352	82	26	163	623
B	summer	2017	6	50	331	285	88	74	778
B	summer	2017	7	50	204	313	100	110	727
B	summer	2017	8	50	NA	NA	NA	NA	NA
B	autumn	2017	9	50	1142	847	621	0	2610
B	autumn	2017	10	50	713	241	159	0	1113
B	autumn	2017	11	50	NA	NA	NA	NA	NA
B	winter	2017	12	50	NA	NA	NA	NA	NA
B	winter	2018	1	50	101	160	4	10	275
B	winter	2018	2	50	163	134	37	19	353
B	spring	2018	3	50	128	114	8	4	254
B	spring	2018	4	50	167	105	23	8	303
B	spring	2018	5	50	155	66	19	74	314
B	summer	2018	6	50	100	45	1	96	242
B	summer	2018	7	50	186	134	95	29	444
B	summer	2018	8	50	590	1099	559	78	2326
B	autumn	2018	9	50	135	163	136	14	448
B	autumn	2018	10	50	10	48	10	8	76
B	autumn	2018	11	50	19	100	93	10	222
B	winter	2018	12	50	59	135	46	56	296
B	winter	2019	1	50	37	152	7	13	209
B	winter	2019	2	50	NA	NA	NA	NA	NA
B	spring	2019	3	50	10	14	5	0	29
B	spring	2019	4	50	22	27	1	24	74
B	spring	2019	5	50	63	28	3	20	114
B	summer	2019	6	50	66	103	35	8	212
B	summer	2019	7	50	161	390	285	0	836
B	summer	2019	8	50	NA	NA	NA	NA	NA
B	autumn	2019	9	50	NA	NA	NA	NA	NA
B	autumn	2019	10	50	63	186	93	0	342
C	spring	2016	3	50	467	423	13	2	905
C	spring	2016	4	50	153	91	6	3	253
C	spring	2016	5	50	1231	502	15	463	2211
C	summer	2016	6	50	108	25	3	11	147
C	summer	2016	7	50	73	41	4	83	201
C	summer	2016	8	50	50	88	0	90	228
C	autumn	2016	9	50	165	125	127	17	434
C	autumn	2016	10	50	266	60	137	4	467
C	autumn	2016	11	50	313	162	74	0	549
C	winter	2016	12	50	120	153	44	2	319
C	winter	2017	1	50	104	54	12	0	170
C	winter	2017	2	50	105	249	3	6	363
C	spring	2017	3	50	135	113	16	2	266
C	spring	2017	4	50	154	41	2	26	223
C	spring	2017	5	50	78	20	5	44	147
C	summer	2017	6	50	418	317	75	67	877
C	summer	2017	7	50	125	227	57	66	475
C	summer	2017	8	50	NA	NA	NA	NA	NA
C	autumn	2017	9	50	1507	652	893	78	3130
C	autumn	2017	10	50	1410	501	210	0	2121
C	autumn	2017	11	50	NA	NA	NA	NA	NA
C	winter	2017	12	50	NA	NA	NA	NA	NA
C	winter	2018	1	50	183	176	38	0	397
C	winter	2018	2	50	210	497	39	0	746
C	spring	2018	3	50	200	150	9	0	359
C	spring	2018	4	50	334	43	0	19	396
C	spring	2018	5	50	NA	NA	NA	NA	NA
C	summer	2018	6	50	22	9	0	13	44
C	summer	2018	7	50	99	124	58	0	281
C	summer	2018	8	50	1033	1045	1367	97	3542
C	autumn	2018	9	50	283	142	274	2	701
C	autumn	2018	10	50	183	95	116	13	407
C	autumn	2018	11	50	241	379	120	33	773
C	winter	2018	12	50	132	287	148	37	604
C	winter	2019	1	50	53	234	5	17	309
C	winter	2019	2	50	NA	NA	NA	NA	NA
C	spring	2019	3	50	155	279	43	15	492
C	spring	2019	4	50	142	188	21	13	364
C	spring	2019	5	50	20	13	2	6	41
C	summer	2019	6	50	41	51	14	2	108
C	summer	2019	7	50	42	165	83	1	291
C	summer	2019	8	50	NA	NA	NA	NA	NA
C	autumn	2019	9	50	NA	NA	NA	NA	NA
C	autumn	2019	10	50	107	87	433	0	627
