# Supplementary material for: Seasonal dynamics of mudflat foraminifera linked to diatom species and traits
Source: Copernicus journal article supplement (doi:10.5194/jm-45-51-2026), 2026-01-15
Supplement: Supplementary file 5 [file Table S7 - foraminifera ANOSIM pairwise.xlsx]

## Sheet: ANOSIM Ammonia
Ammonia confertitesta	R statistic	p-value
Seasons
$autumn_vs_winter	0.15	0.004
$autumn_vs_summer	0.11	0.001
Stations		> 0.05
Station*Season
$B.summer_vs_B.winter	0.2	0.04
$A.summer_vs_B.winter	0.21	0.042
$C.autumn_vs_B.winter	0.3	0.012
$C.autumn_vs_C.summer	0.23	0.01
$B.autumn_vs_B.summer	0.17	0.03
$B.autumn_vs_A.summer	0.15	0.04
$A.autumn_vs_C.winter	0.46	0.004
$A.autumn_vs_B.winter	0.48	0.002
$A.autumn_vs_C.summer	0.41	0.003
$A.autumn_vs_A.summer	0.17	0.042

## Sheet: ANOSIM Haynesina
Haynesina germanica	R statistic	p-value
Seasons station B
$autumn_vs_spring	0.18	0.004
Stations		> 0.05
Station*Season		> 0.05

## Sheet: ANOSIM Oceanense
Elphidium oceanense	R statistic	p-value
Seasons	0.24	0.001
$spring_vs_summer	0.1429	0.001
$autumn_vs_winter	0.4692	0.001
$autumn_vs_summer	0.1677	0.001
$autumn_vs_spring	0.6081	0.001
Stations		> 0.05
Station*Season	0.18	0.001
$A.autumn_vs_A.spring	0.52	0.001
$A.autumn_vs_B.spring	0.75	0.001
$A.autumn_vs_C.spring	0.63	0.001
$A.autumn_vs_A.summer	0.25	0.01
$A.autumn_vs_C.summer	0.20	0.01
$A.autumn_vs_A.winter	0.47	0.001
$A.autumn_vs_B.winter	0.60	0.002
$A.autumn_vs_C.winter	0.39	0.006
$B.autumn_vs_A.spring	0.39	0.001
$B.autumn_vs_B.spring	0.60	0.001
$B.autumn_vs_C.spring	0.49	0.001
$B.autumn_vs_A.winter	0.32	0.005
$B.autumn_vs_B.winter	0.45	0.005
$B.autumn_vs_C.winter	0.29	0.02
$C.autumn_vs_A.spring	0.58	0.001
$C.autumn_vs_B.spring	0.81	0.001
$C.autumn_vs_C.spring	0.69	0.001
$C.autumn_vs_A.summer	0.29	0.005
$C.autumn_vs_C.summer	0.21	0.005
$C.autumn_vs_A.winter	0.53	0.001
$C.autumn_vs_B.winter	0.68	0.001
$C.autumn_vs_C.winter	0.45	0.001
$A.spring_vs_B.summer	0.17	0.018
$B.spring_vs_B.summer	0.24	0.013
$B.spring_vs_C.summer	0.17	0.01
$C.spring_vs_B.summer	0.18	0.014

## Sheet: ANOSIM Selseyense
Elphidium selseyense	R statistic	p-value
Seasons	0.007	0.003
$summer_vs_winter	0.1932	0.003
$spring_vs_summer	0.08286	0.011
$autumn_vs_summer	0.1764	0.002
Station		> 0.05
Station*Season		> 0.05
