# Supplementary material for: Seasonal dynamics of mudflat foraminifera linked to diatom species and traits
Source: Copernicus journal article supplement (doi:10.5194/jm-45-51-2026), 2026-01-15
Supplement: Supplementary file 6 [file Table S8 - DistLMmodel.xlsx]

## Sheet: DistLM model
MARGINAL TEST			SEQUENTIAL TEST
Ammonia confertitesta			Ammonia confertitesta
Diatom Species	p-values		Diatom Species	p-values	AIC	Cumul
Pleurosigma aestuarii	0.004			NS
Pleurosigma angulatum	0.026
Navicula spartinetensis	0.04
Thalassiosira sp.	0.014
Gyrosigma fasciola	0.017
Cymatosira belgica	0.046
Haynesina germanica			Haynesina germanica
Diatom Species	p-values		Diatom Species	p-values	AIC	Cumul
Pleurosigma aestuarii	0.003		Pleurosigma aestuarii	0.007	146.72	0.27
Navicula cf flagellifera	0.048		Navicula cf flagellifera	0.021	142.79	0.43
Plagiotropis vanheurckii	0.041		Nitzschia cf distans	0.028	139.61	0.54
			Entomoneis paludosa	0.015	134.7	0.65
			Plagiotropis vanheurckii	0.031	131.54	0.72
			Gyrosigma fasciola	0.008	117.6	0.91
Elphidium oceanense			Elphidium oceanense
Diatom Species	p-values		Diatom Species	p-values	AIC	Cumul
Plagiotropis vanheurckii	0.014		Podosira stelligera	0.006	168.64	0.21
Gyrosigma wansbeckii	0.008		Skeletonema sp.	0.003	164.11	0.40
Thalassiosira sp.	0.048		Entomoneis paludosa	0.014	160.64	0.52
Podosira stelligera	0.011		Thalassiosira sp.	0.032	155.53	0.70
Navicula cf flagellifera	0.027		Navicula spartinetensis	0.045	151.11	0.79
Eutonogramma dubium	0.016
Plagiogrammopsis vanheurckii	0.023
Skeletonema sp.	0.049
Elphidium selseyense			Elphidium selseyense
Diatom Species	p-values		Diatom Species	p-values	AIC	Cumul
	NS		Navicula abscondita	0.018	120.53	0.52
NS = non-significative
