# Supplementary material for: Seasonal dynamics of mudflat foraminifera linked to diatom species and traits
Source: Copernicus journal article supplement (doi:10.5194/jm-45-51-2026), 2026-01-15
Supplement: Supplementary file [file jm-45-51-2026-supplement-title-page.pdf › jm-45-51-2026-supplement-title-page.pdf]

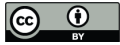

## *Supplement of*

# **Seasonal dynamics of mudflat foraminifera linked to diatom species and traits**

**Constance Choquel et al.**

*Correspondence to:* Constance Choquel ([constance.choquel@univ-angers.fr](mailto:constance.choquel@univ-angers.fr))

- [jm-45-51-2026-supplement-title-page.pdf](#)
- Supplements
  - [Table S1 - overview sampling strategy.pdf](#)
  - [Table S2 - environmental data.xlsx](#)
  - [Table S3 - seasonal environmental variations.pdf](#)
  - [Table S4 - diatoms data.xlsx](#)
  - [Table S5 - spearman diatoms environment.xlsx](#)
  - [Table S6- foraminifera data.xlsx](#)
  - [Table S7 - foraminifera ANOSIM pairwise.xlsx](#)
  - [Table S8 - DistLMmodel.xlsx](#)

The copyright of individual parts of the supplement might differ from the article licence.
